# Supplementary material
Source: ML conference proceedings conference paper supplement (https://openreview.net/forum?id=odWYytUjl1)

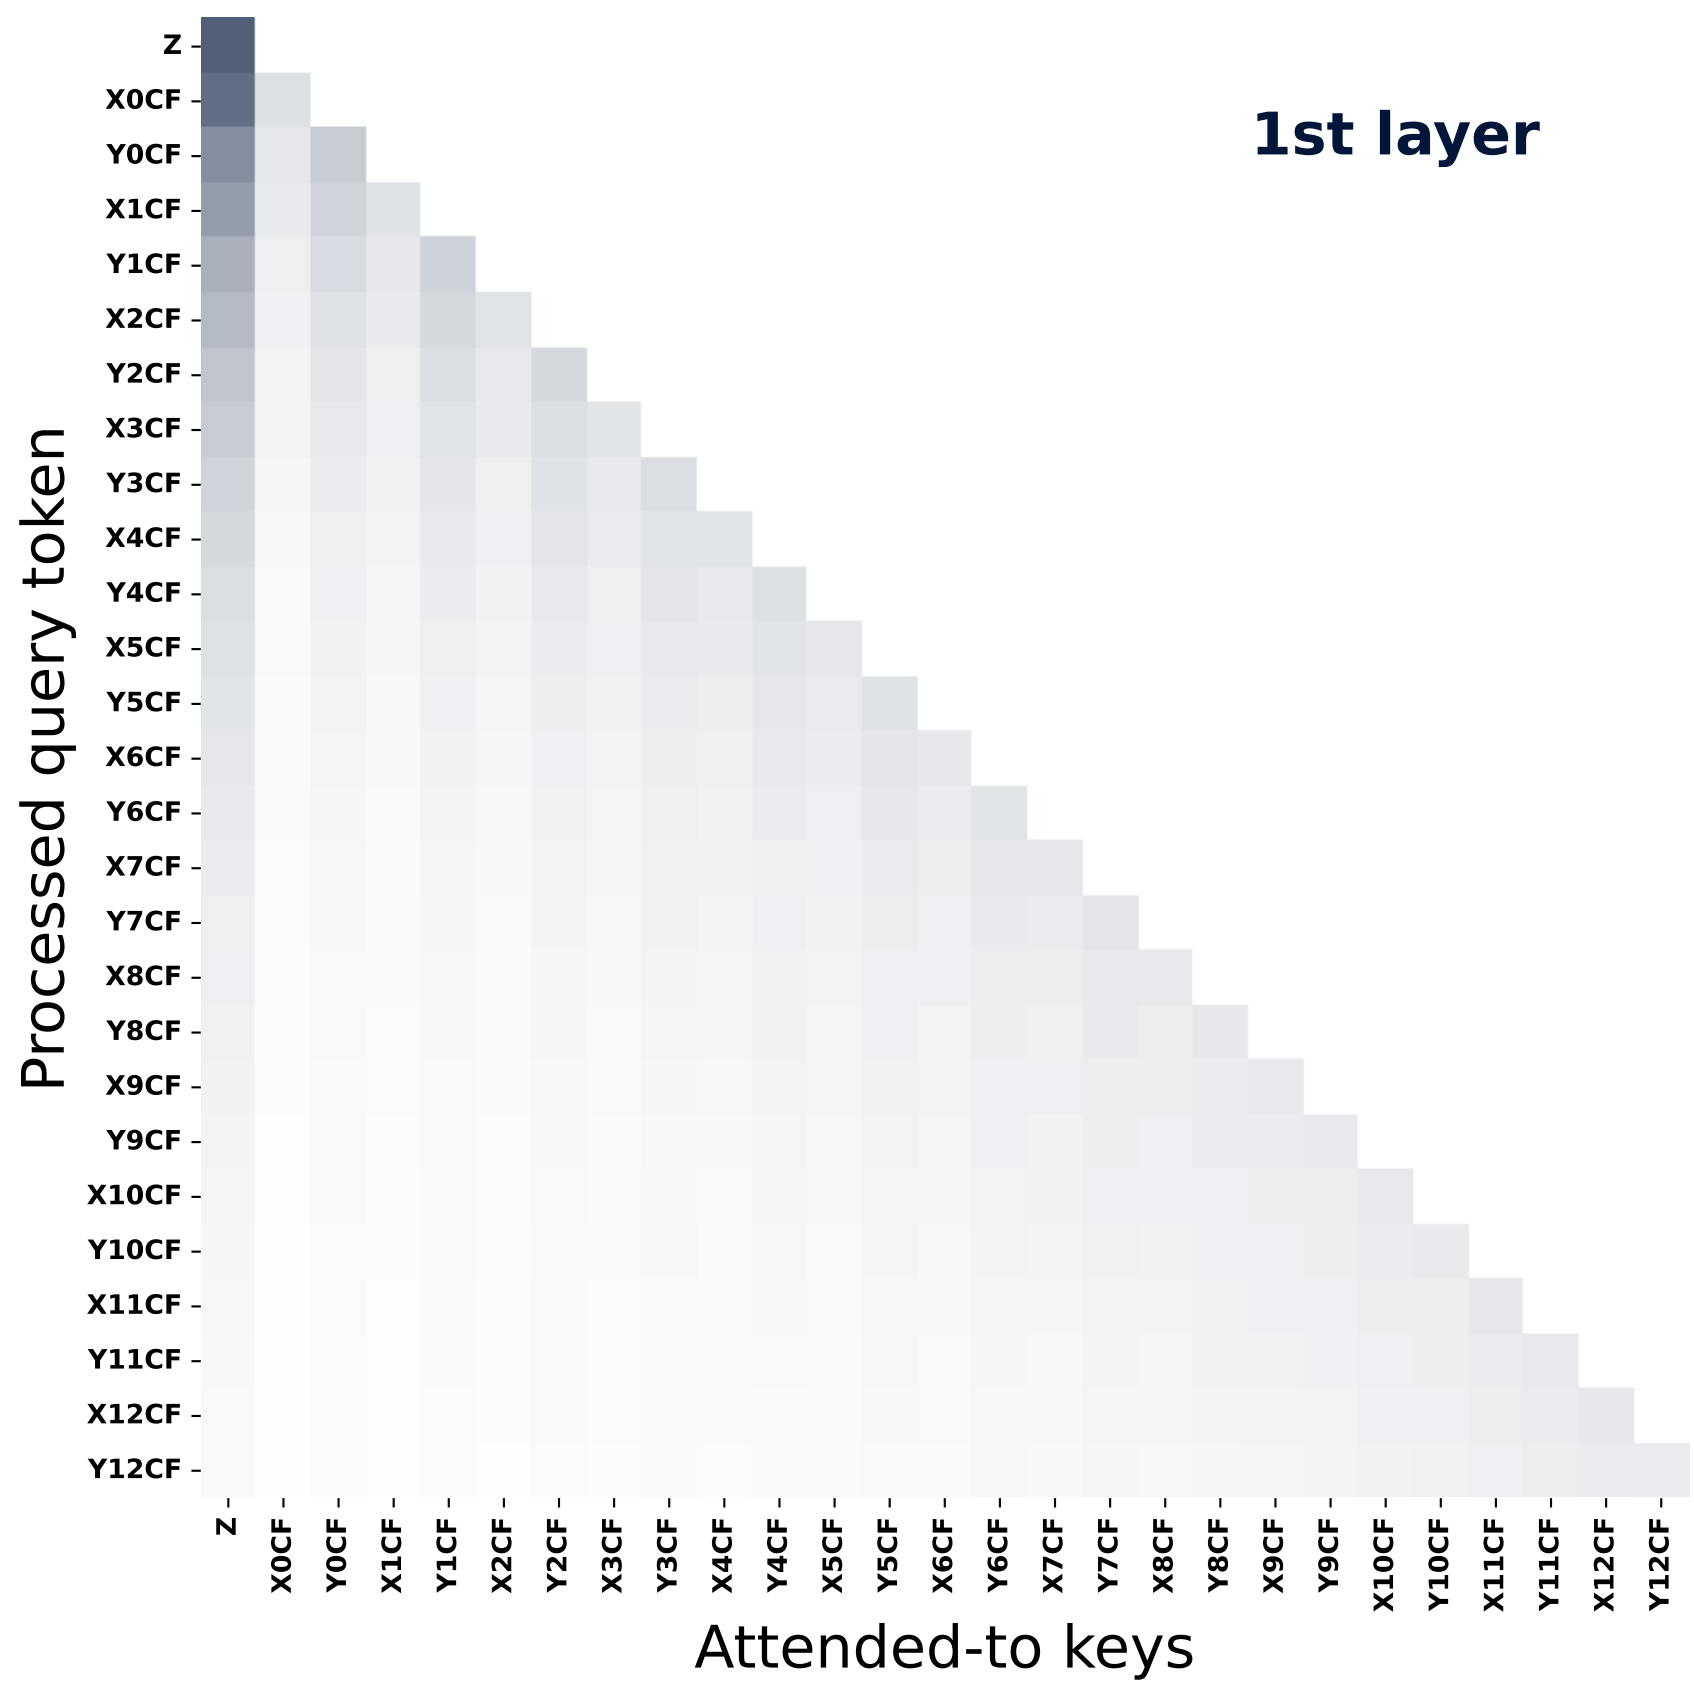

Supplement: supplementary_material [file attentions_layer_0_head_0_eightlayer_ao_sde.pdf › code_to_release/src/visualizations/attentions_layer_0_head_0_eightlayer_ao_sde.pdf]

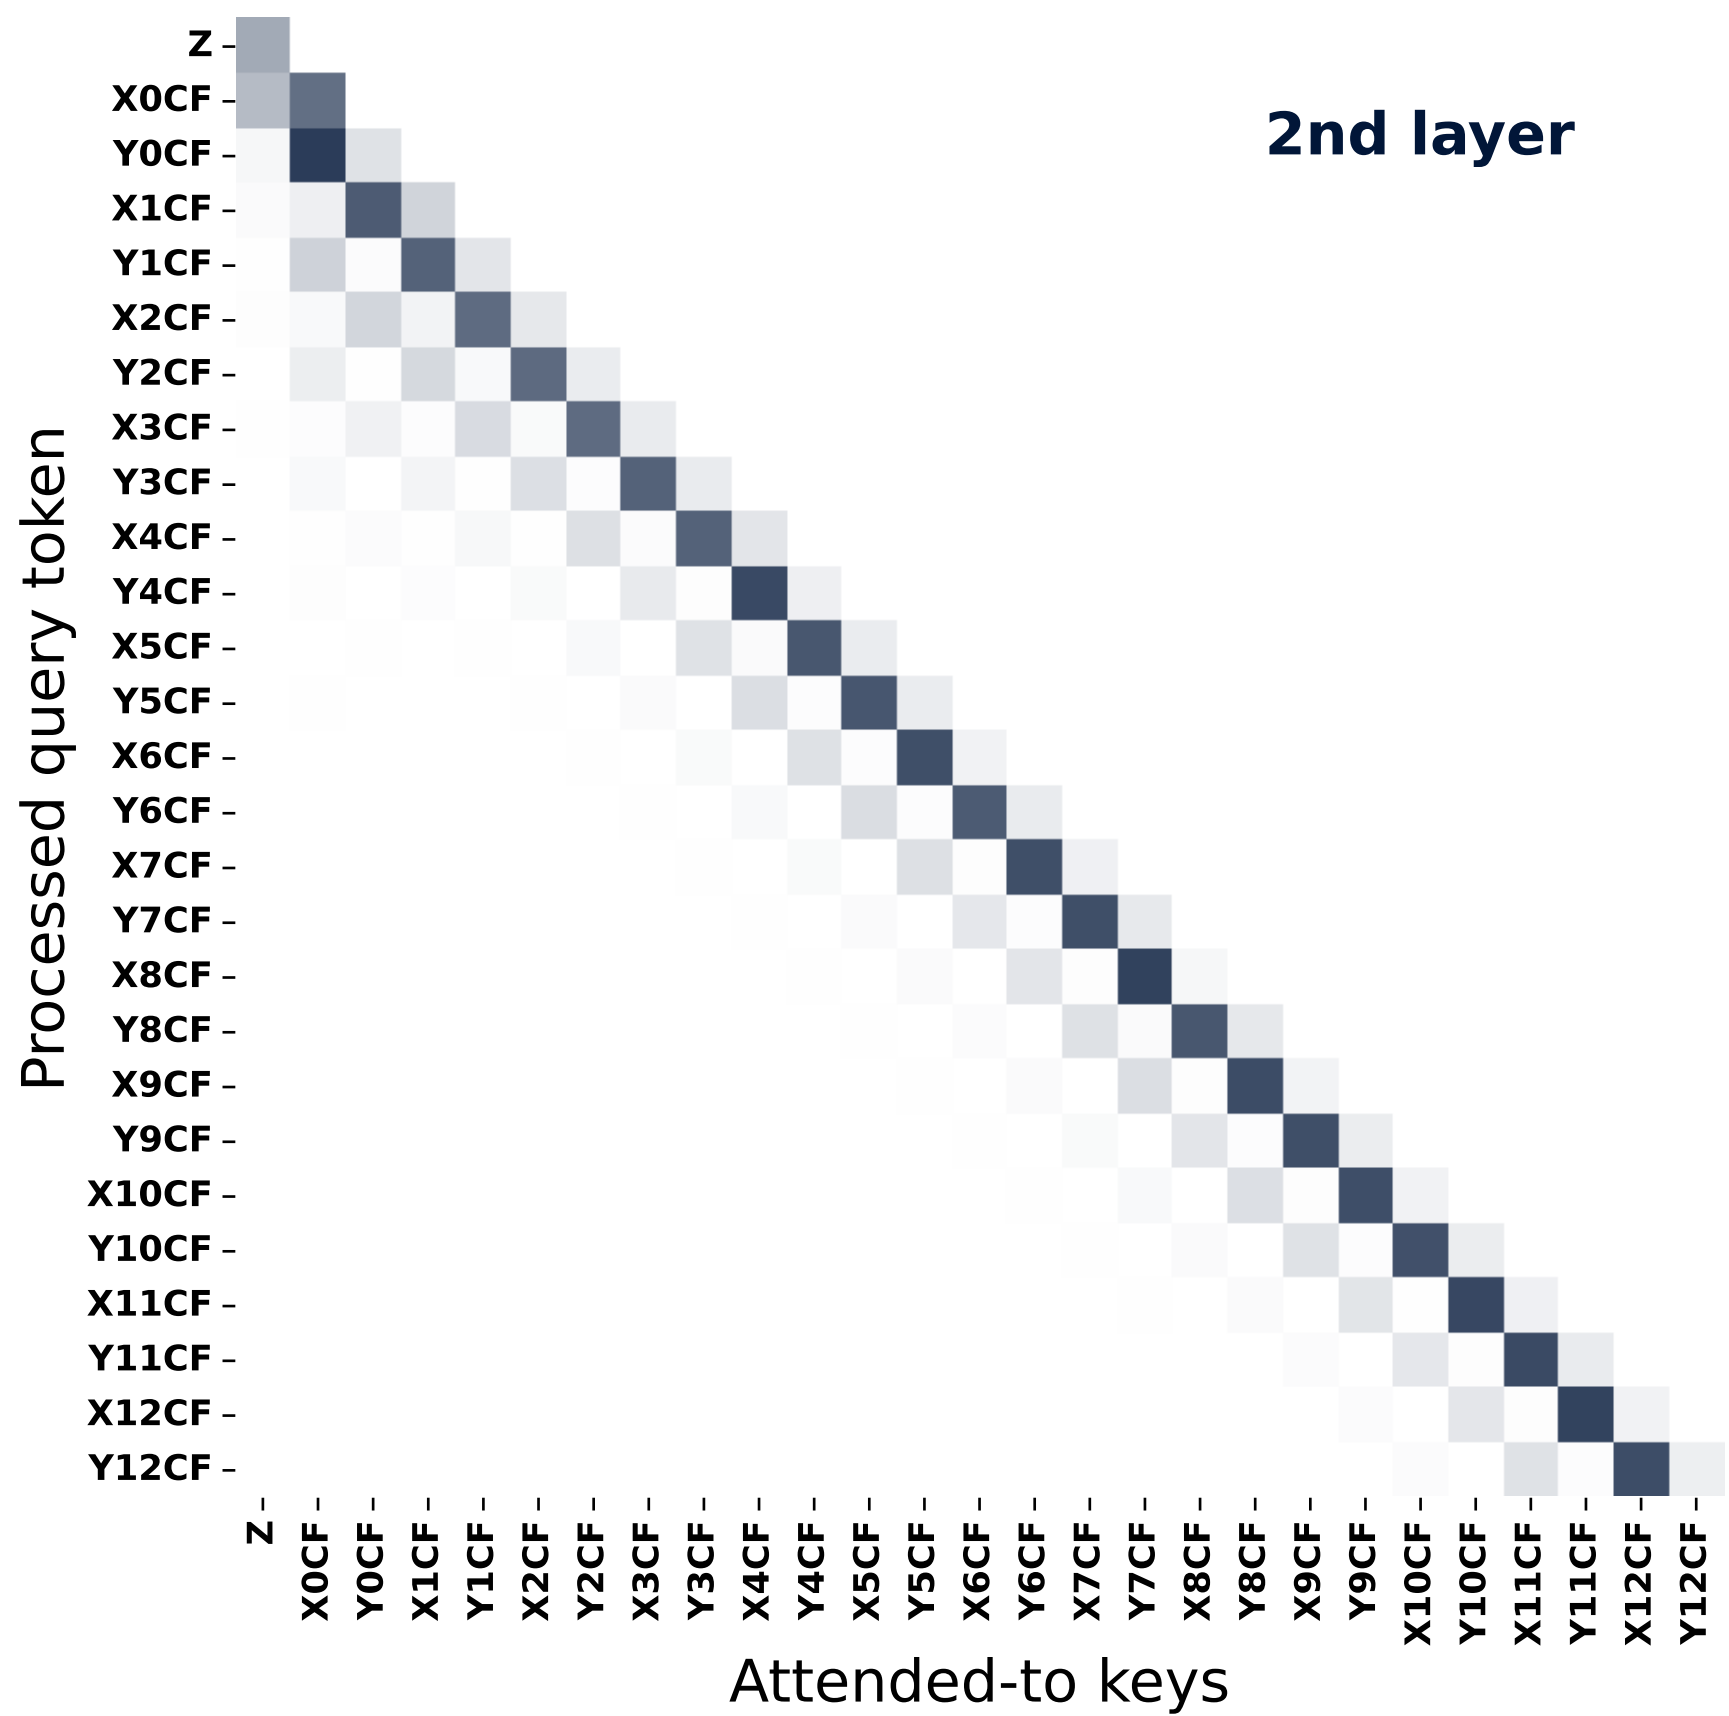

Supplement: supplementary_material [file attentions_layer_1_head_0_eightlayer_ao_sde.pdf › code_to_release/src/visualizations/attentions_layer_1_head_0_eightlayer_ao_sde.pdf]

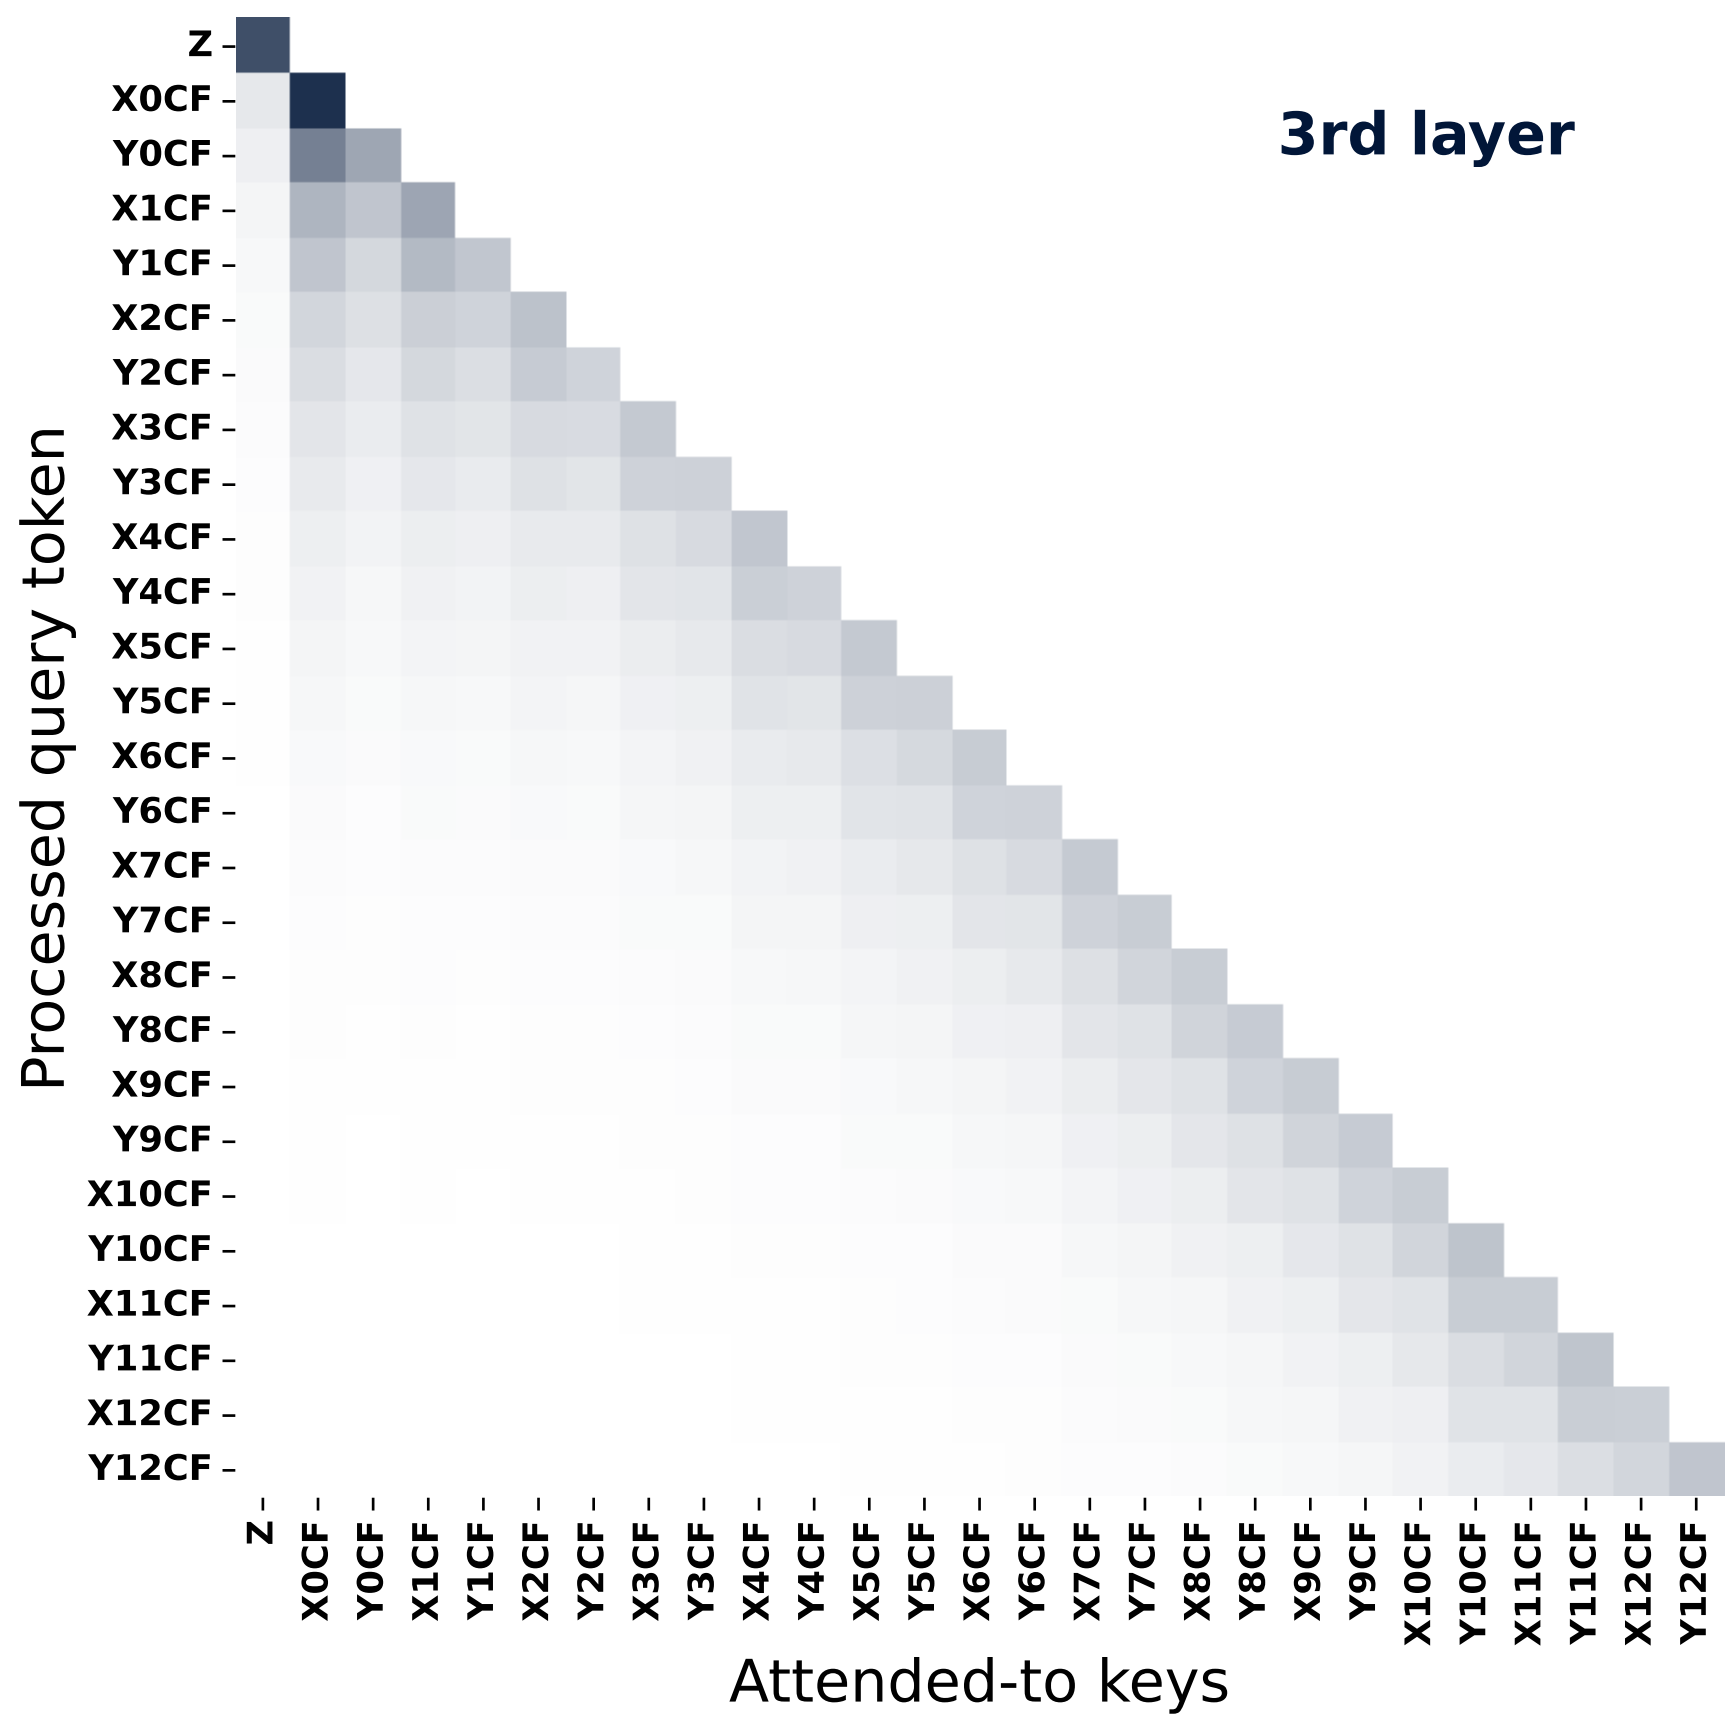

Supplement: supplementary_material [file attentions_layer_2_head_0_eightlayer_ao_sde.pdf › code_to_release/src/visualizations/attentions_layer_2_head_0_eightlayer_ao_sde.pdf]

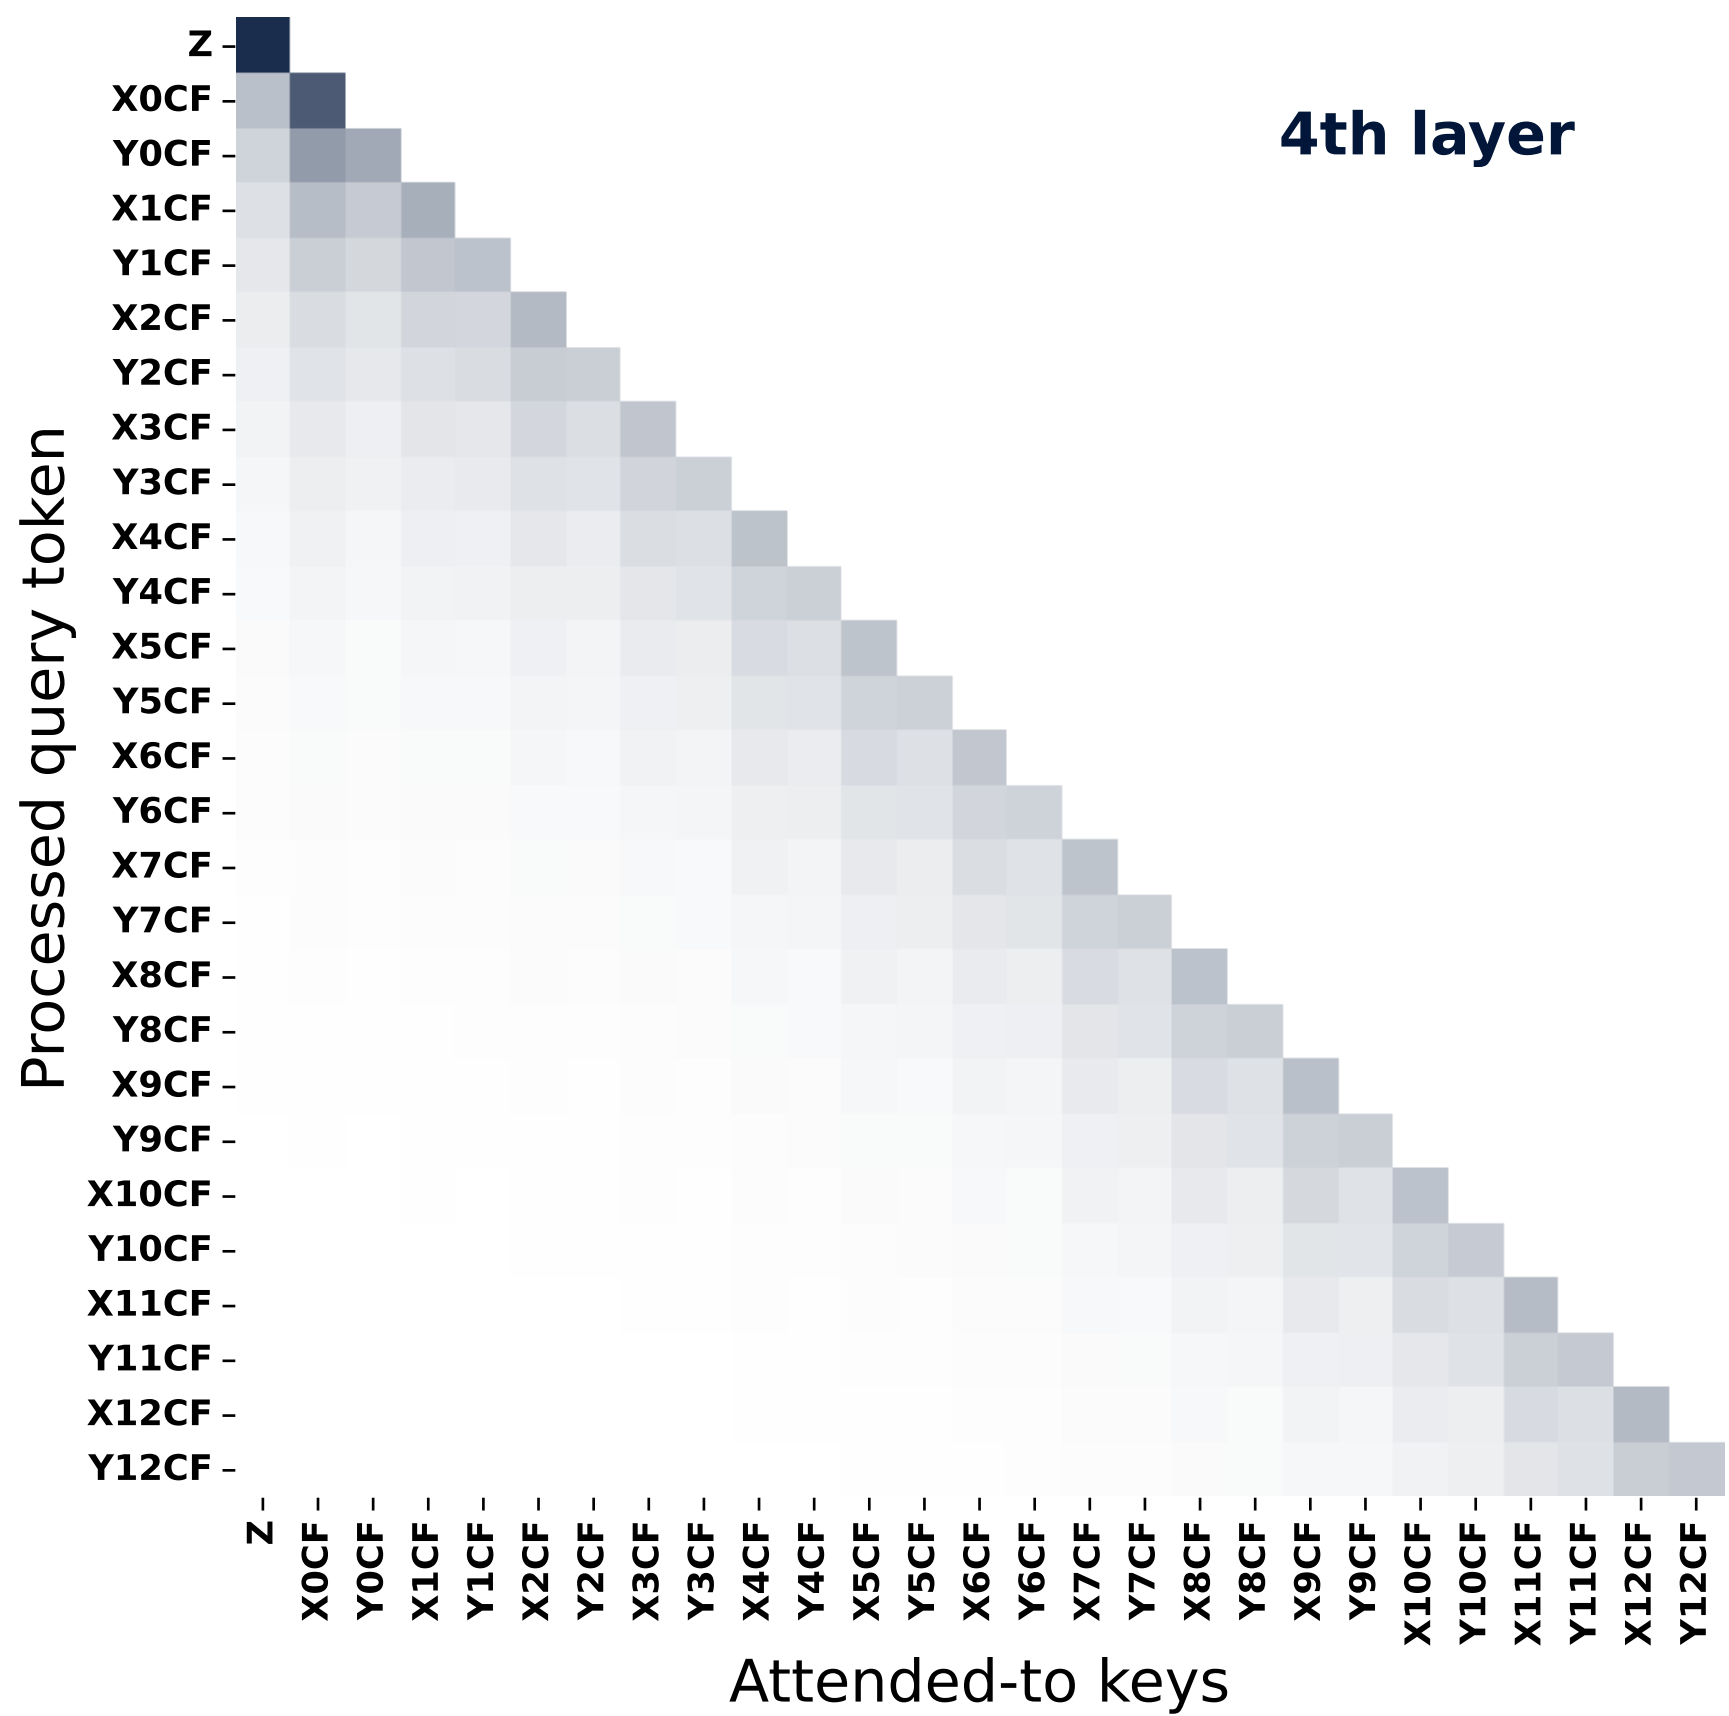

Supplement: supplementary_material [file attentions_layer_3_head_0_eightlayer_ao_sde.pdf › code_to_release/src/visualizations/attentions_layer_3_head_0_eightlayer_ao_sde.pdf]

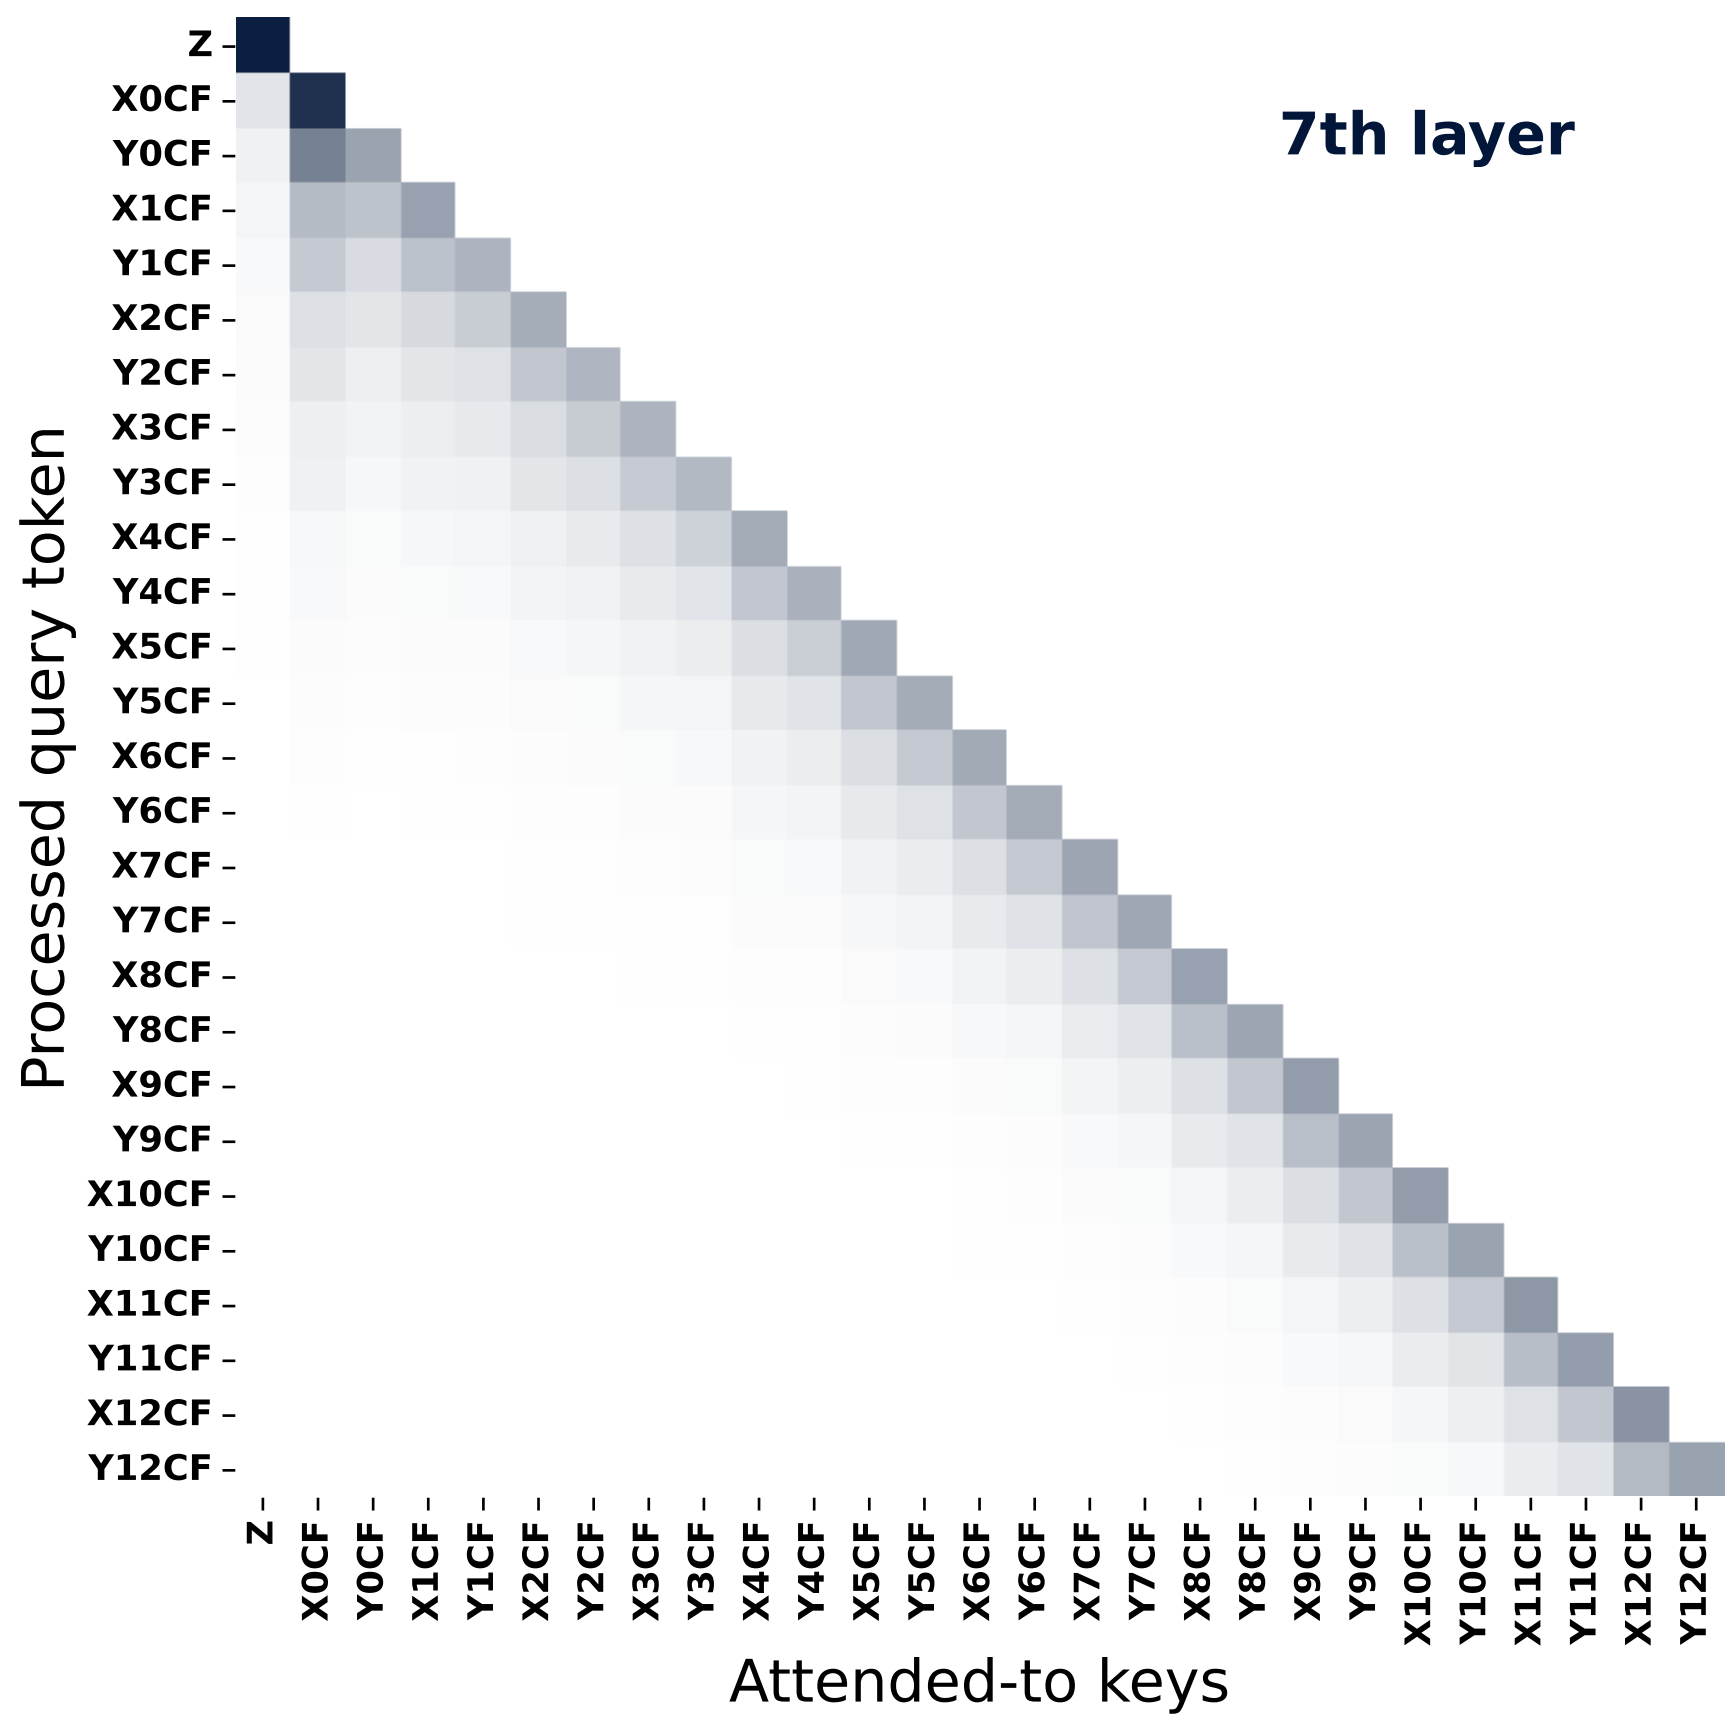

Supplement: supplementary_material [file attentions_layer_6_head_0_eightlayer_ao_sde.pdf › code_to_release/src/visualizations/attentions_layer_6_head_0_eightlayer_ao_sde.pdf]

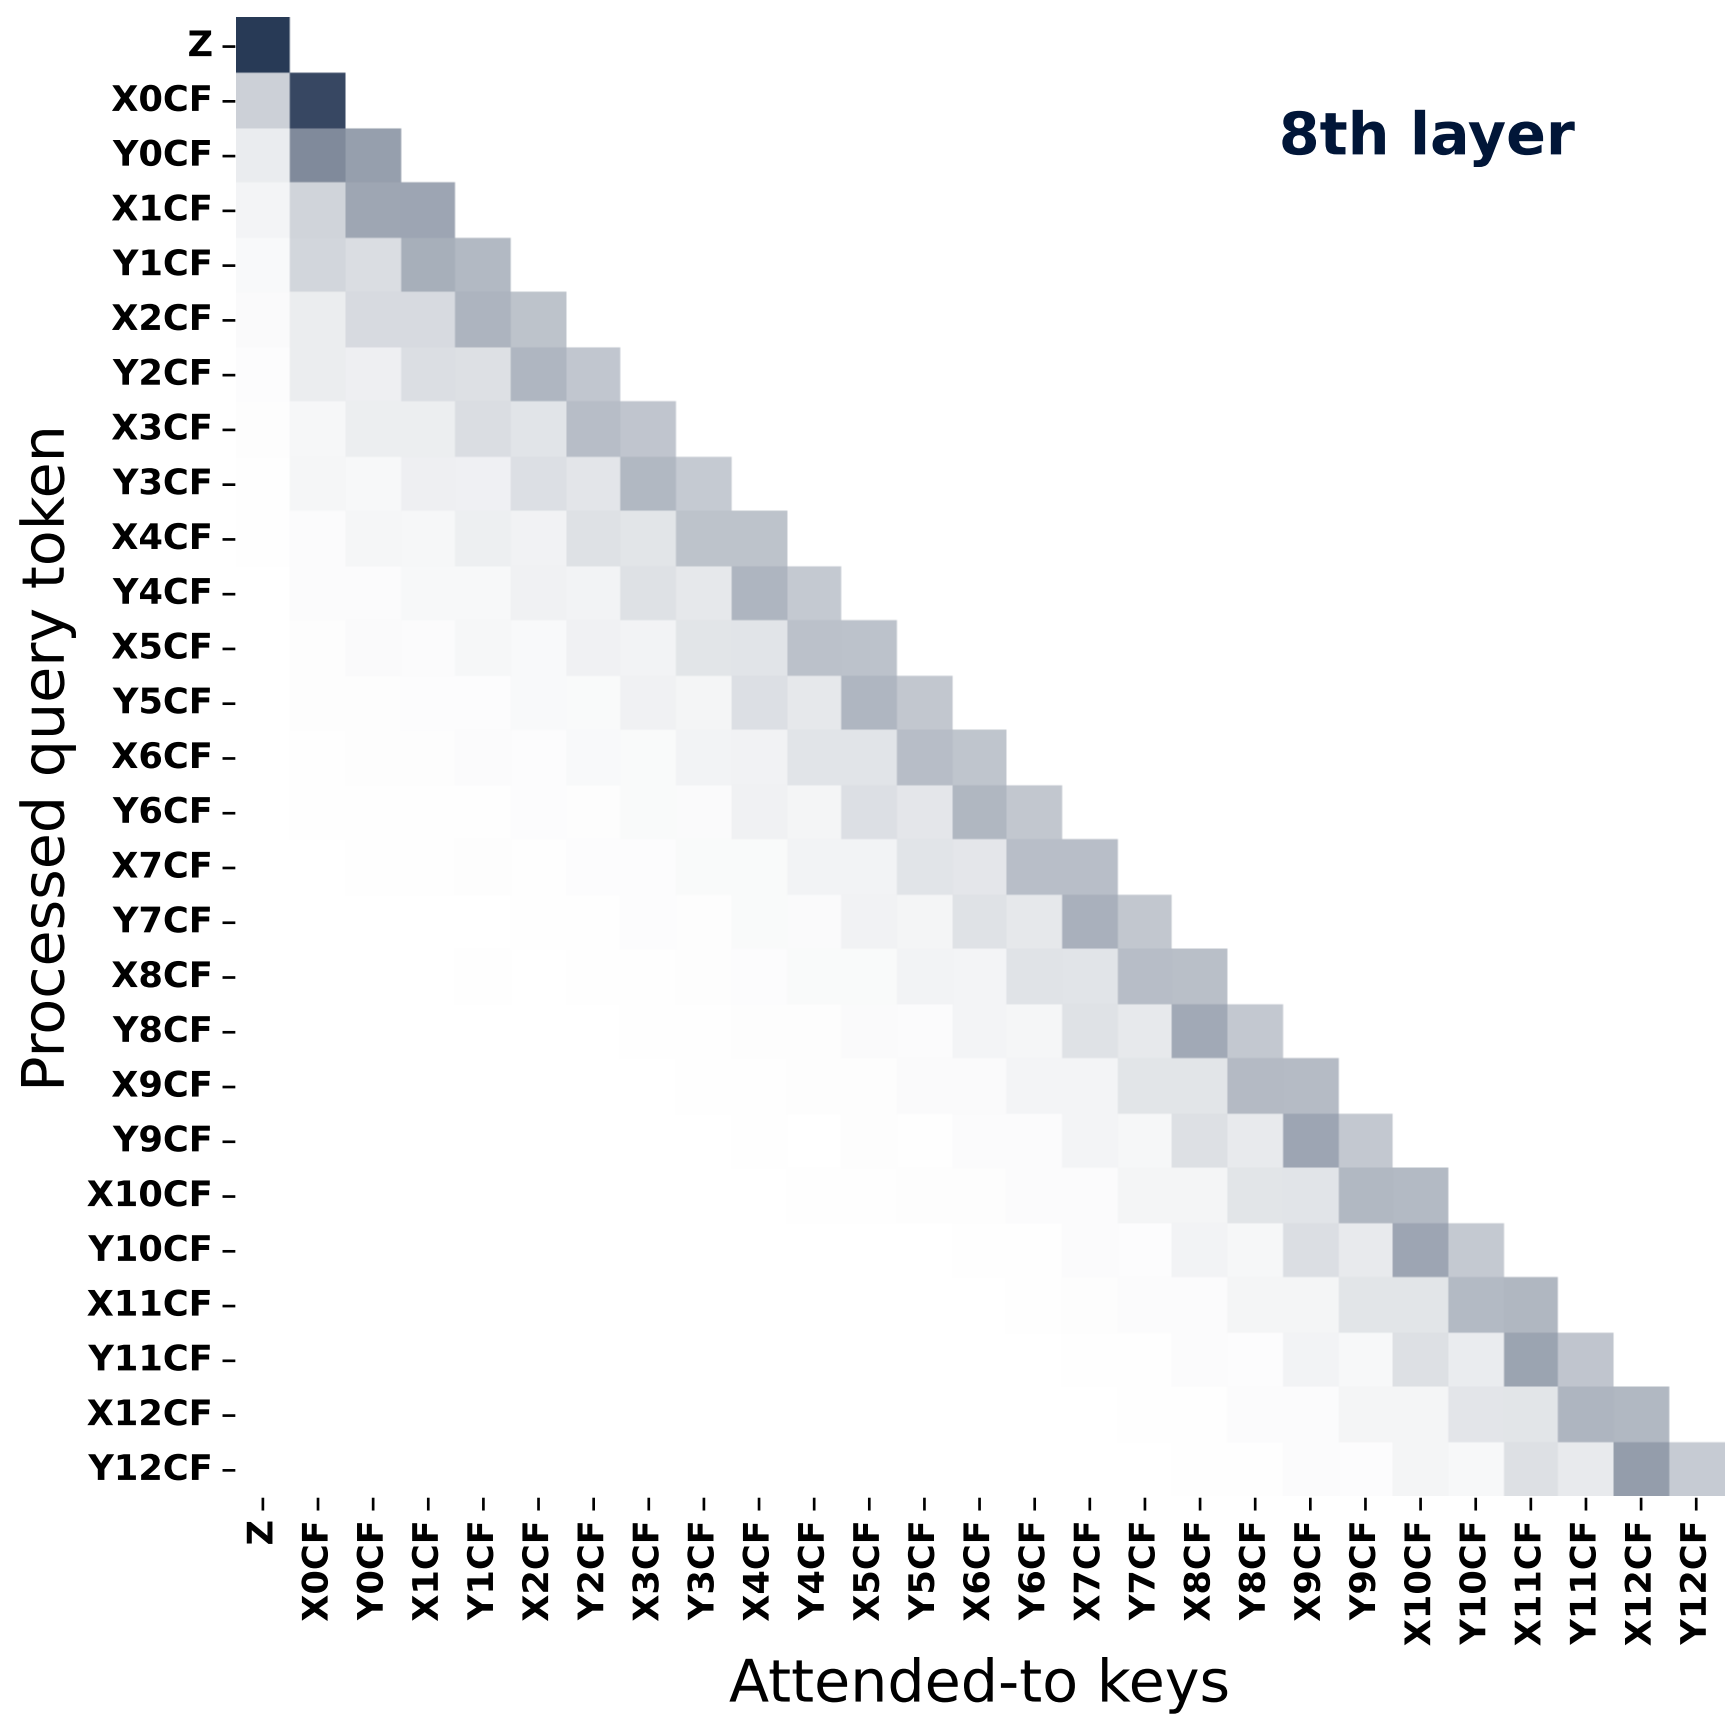

Supplement: supplementary_material [file attentions_layer_7_head_0_eightlayer_ao_sde.pdf › code_to_release/src/visualizations/attentions_layer_7_head_0_eightlayer_ao_sde.pdf]

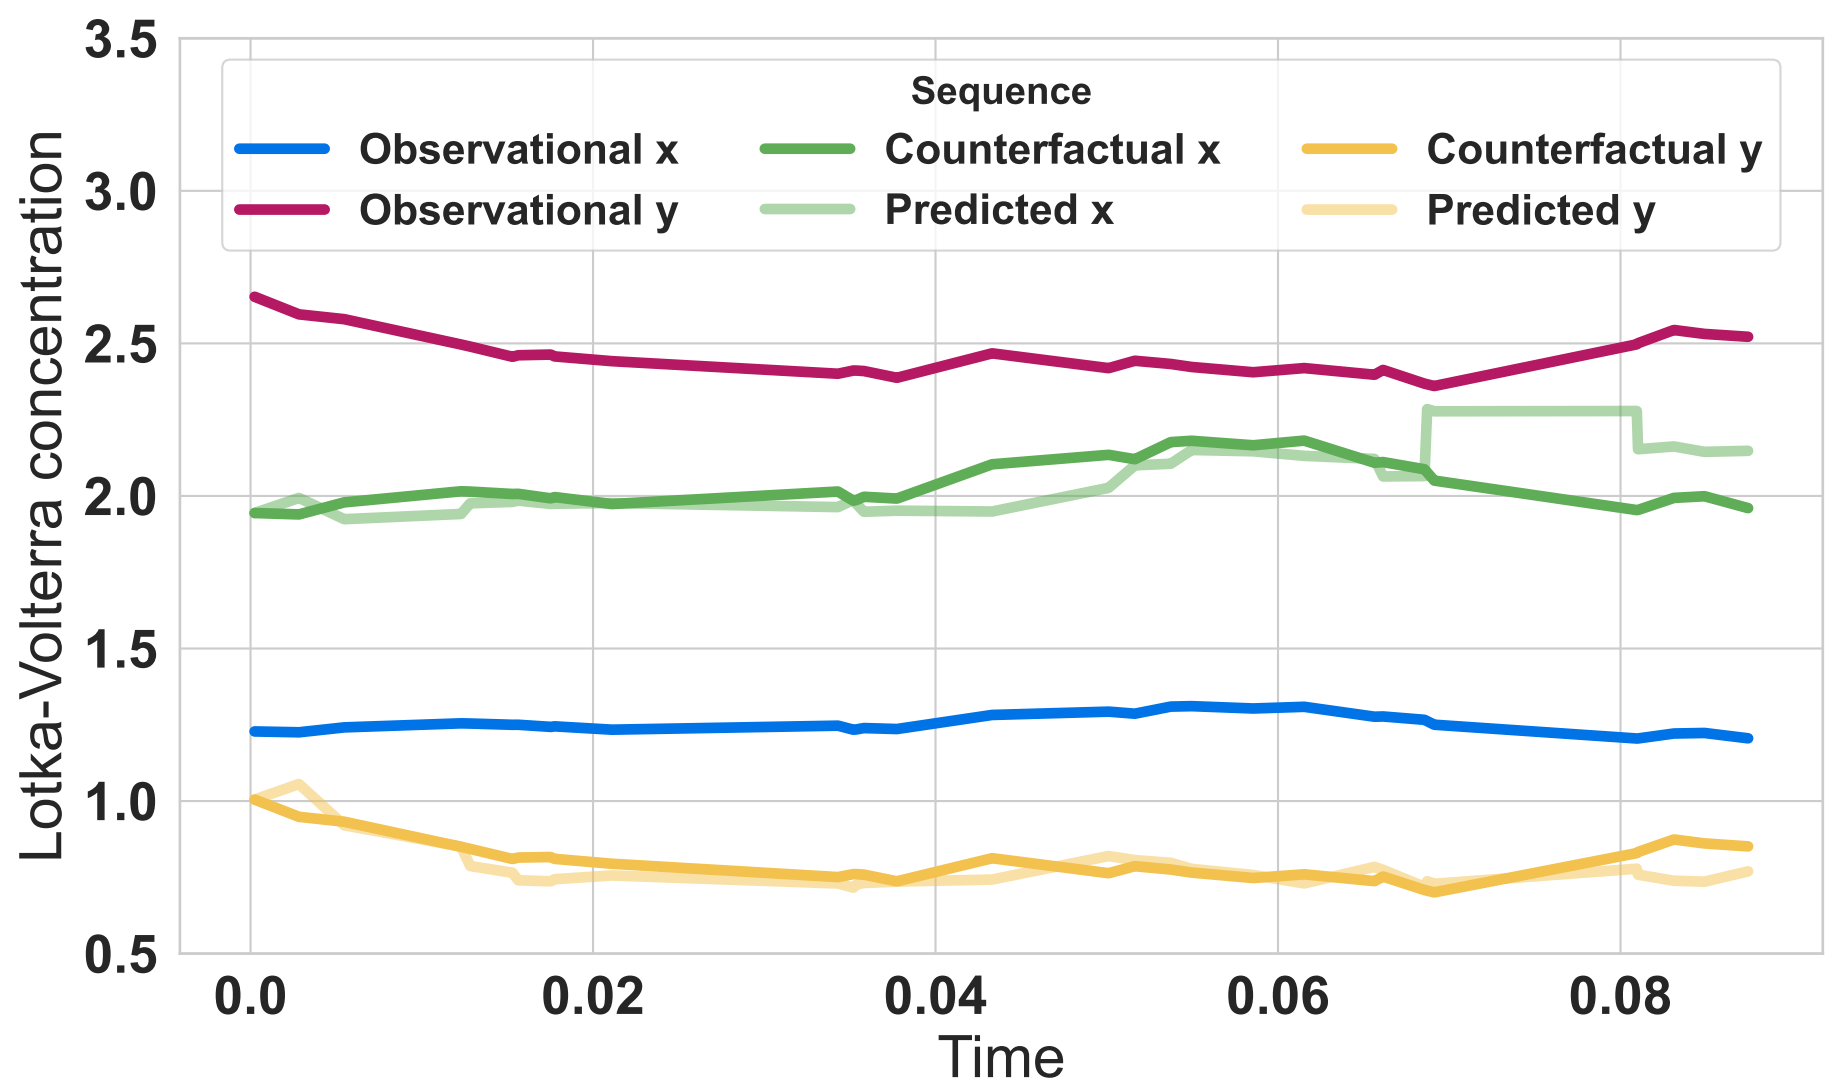

Supplement: supplementary_material [file chart_sde_eightlayer_ao.pdf › code_to_release/src/visualizations/chart_sde_eightlayer_ao.pdf]

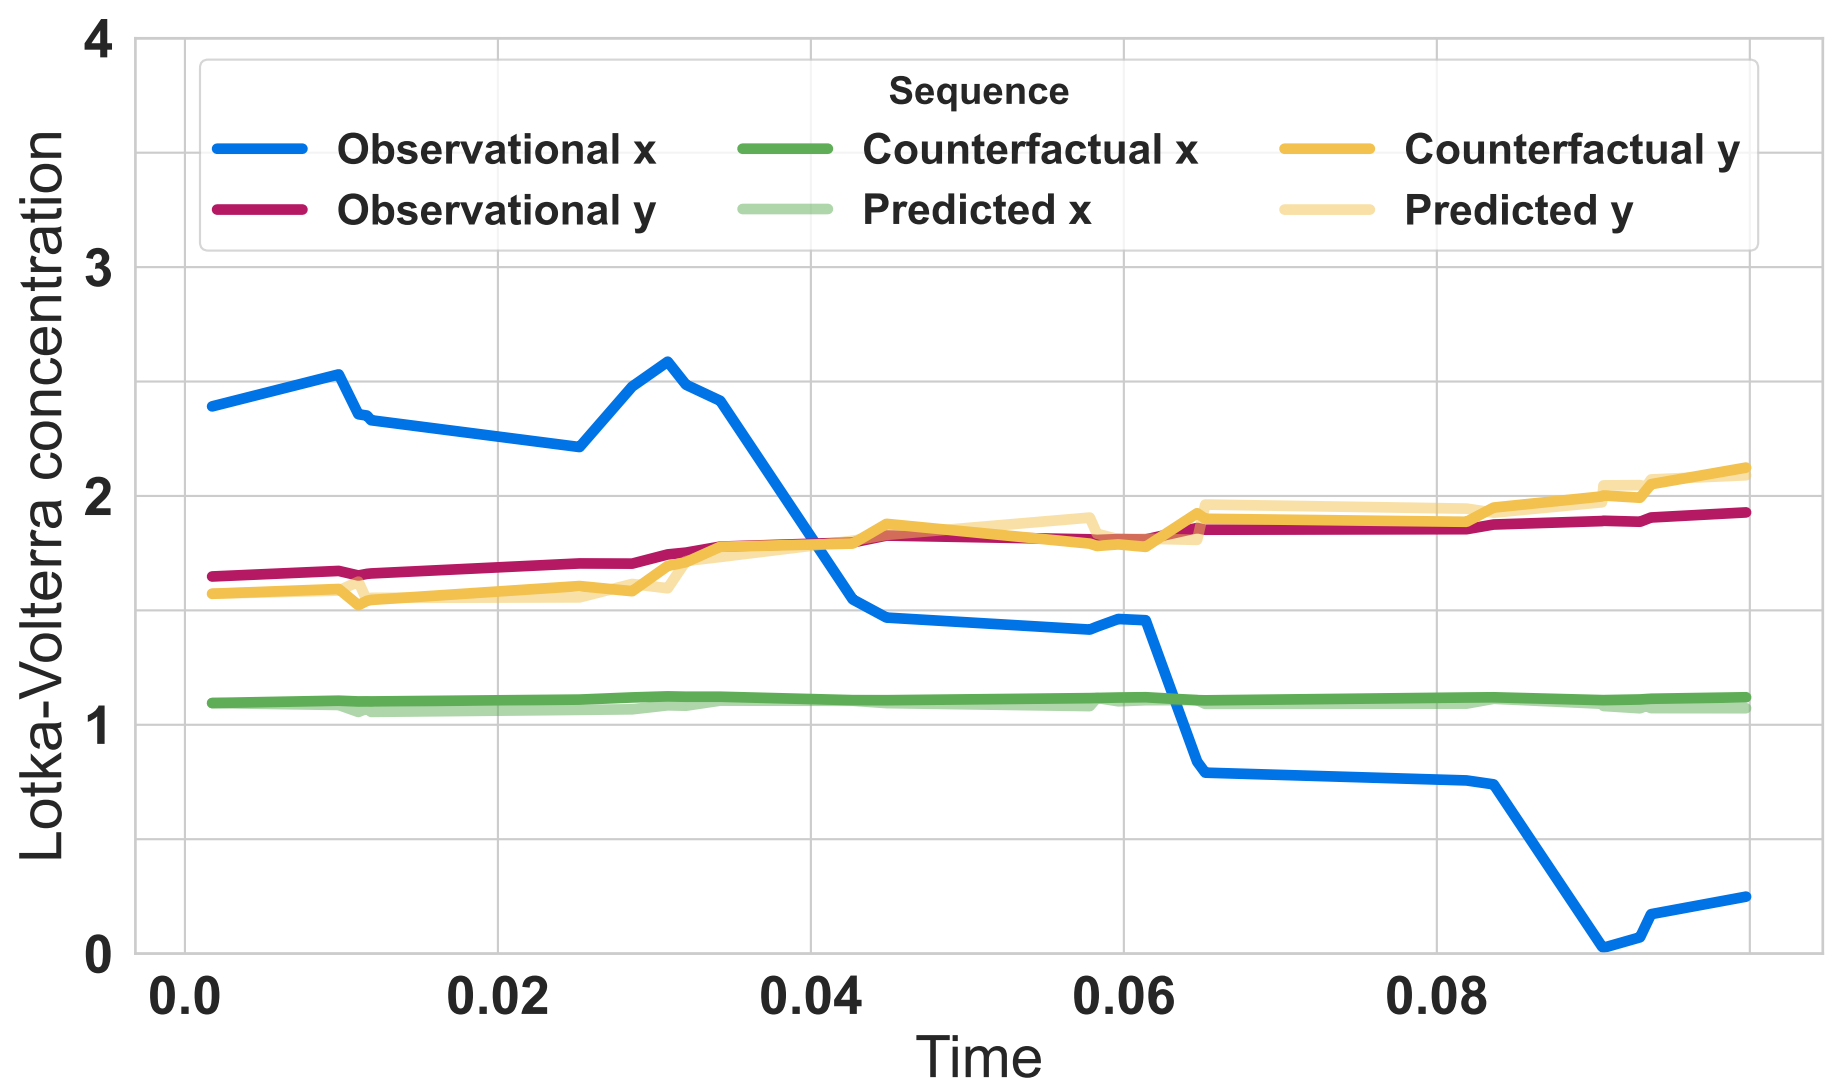

Supplement: supplementary_material [file chart_sde_standard.pdf › code_to_release/src/visualizations/chart_sde_standard.pdf]

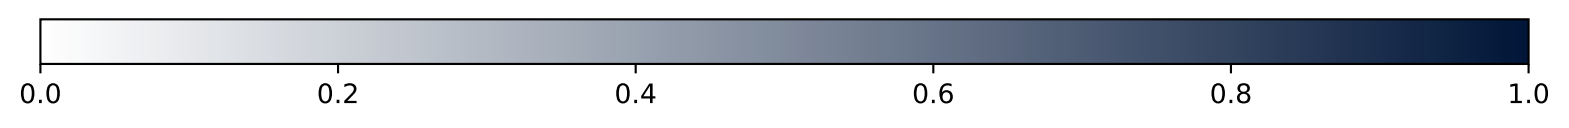

Supplement: supplementary_material [file custom_colorbar.pdf › code_to_release/src/visualizations/custom_colorbar.pdf]

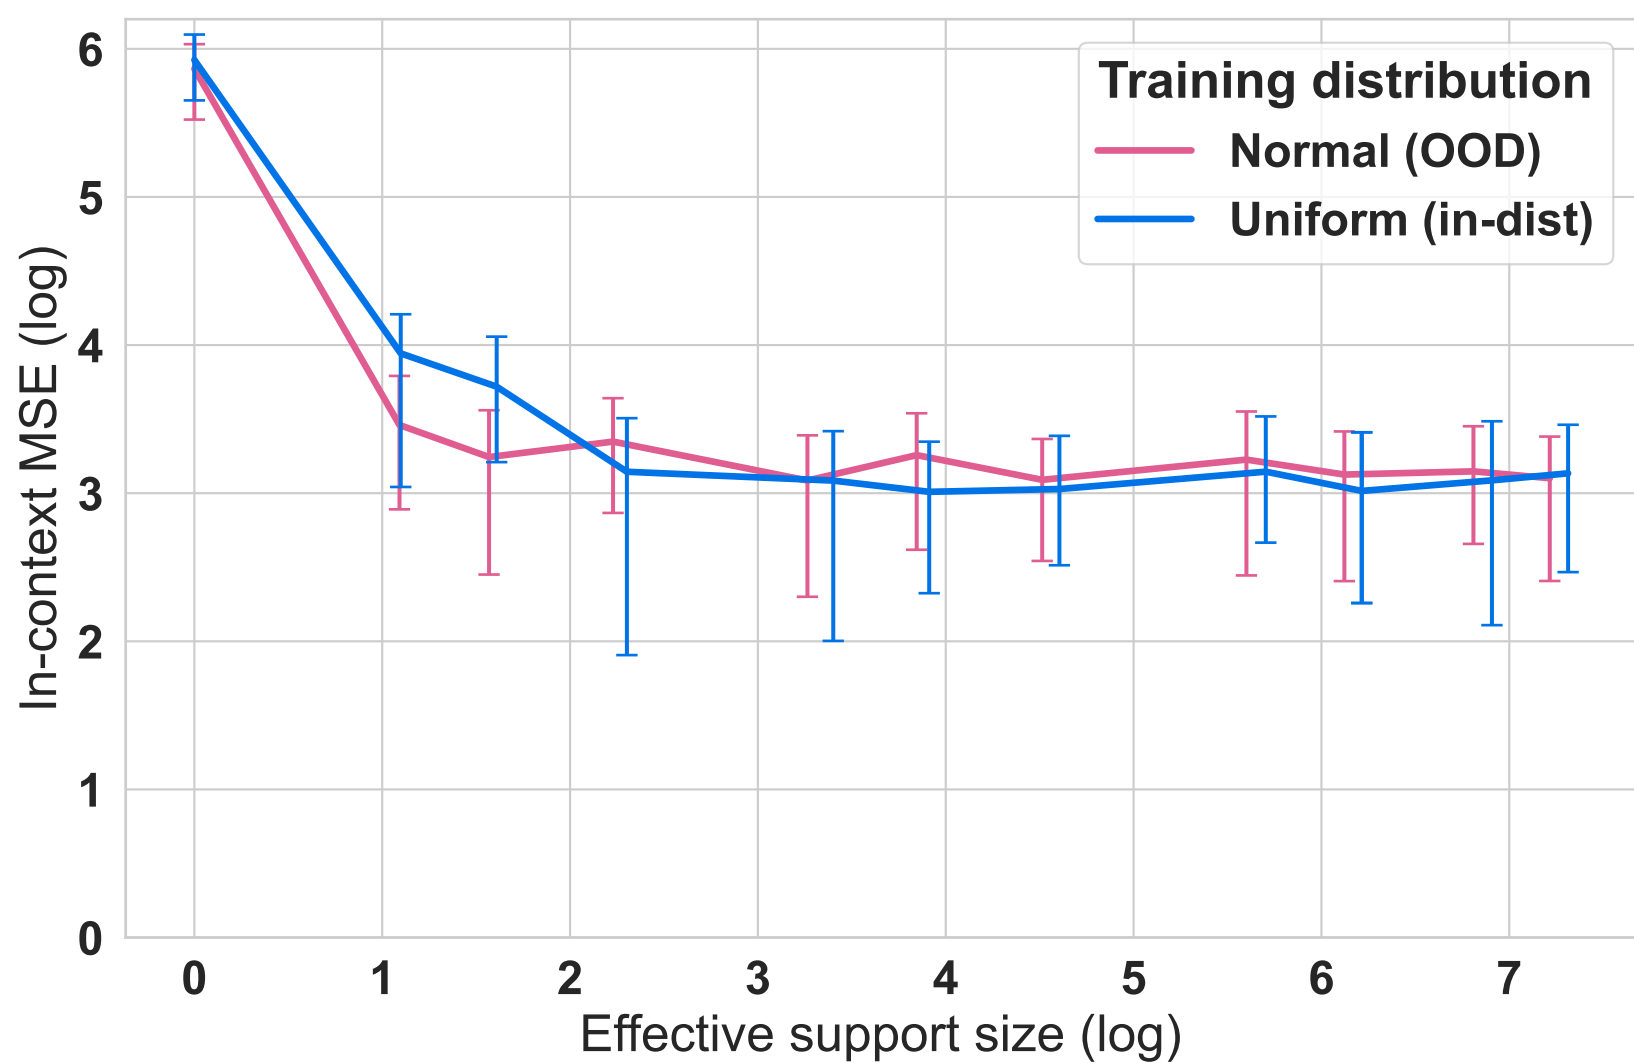

Supplement: supplementary_material [file ess_1.pdf › code_to_release/src/visualizations/ess_1.pdf]

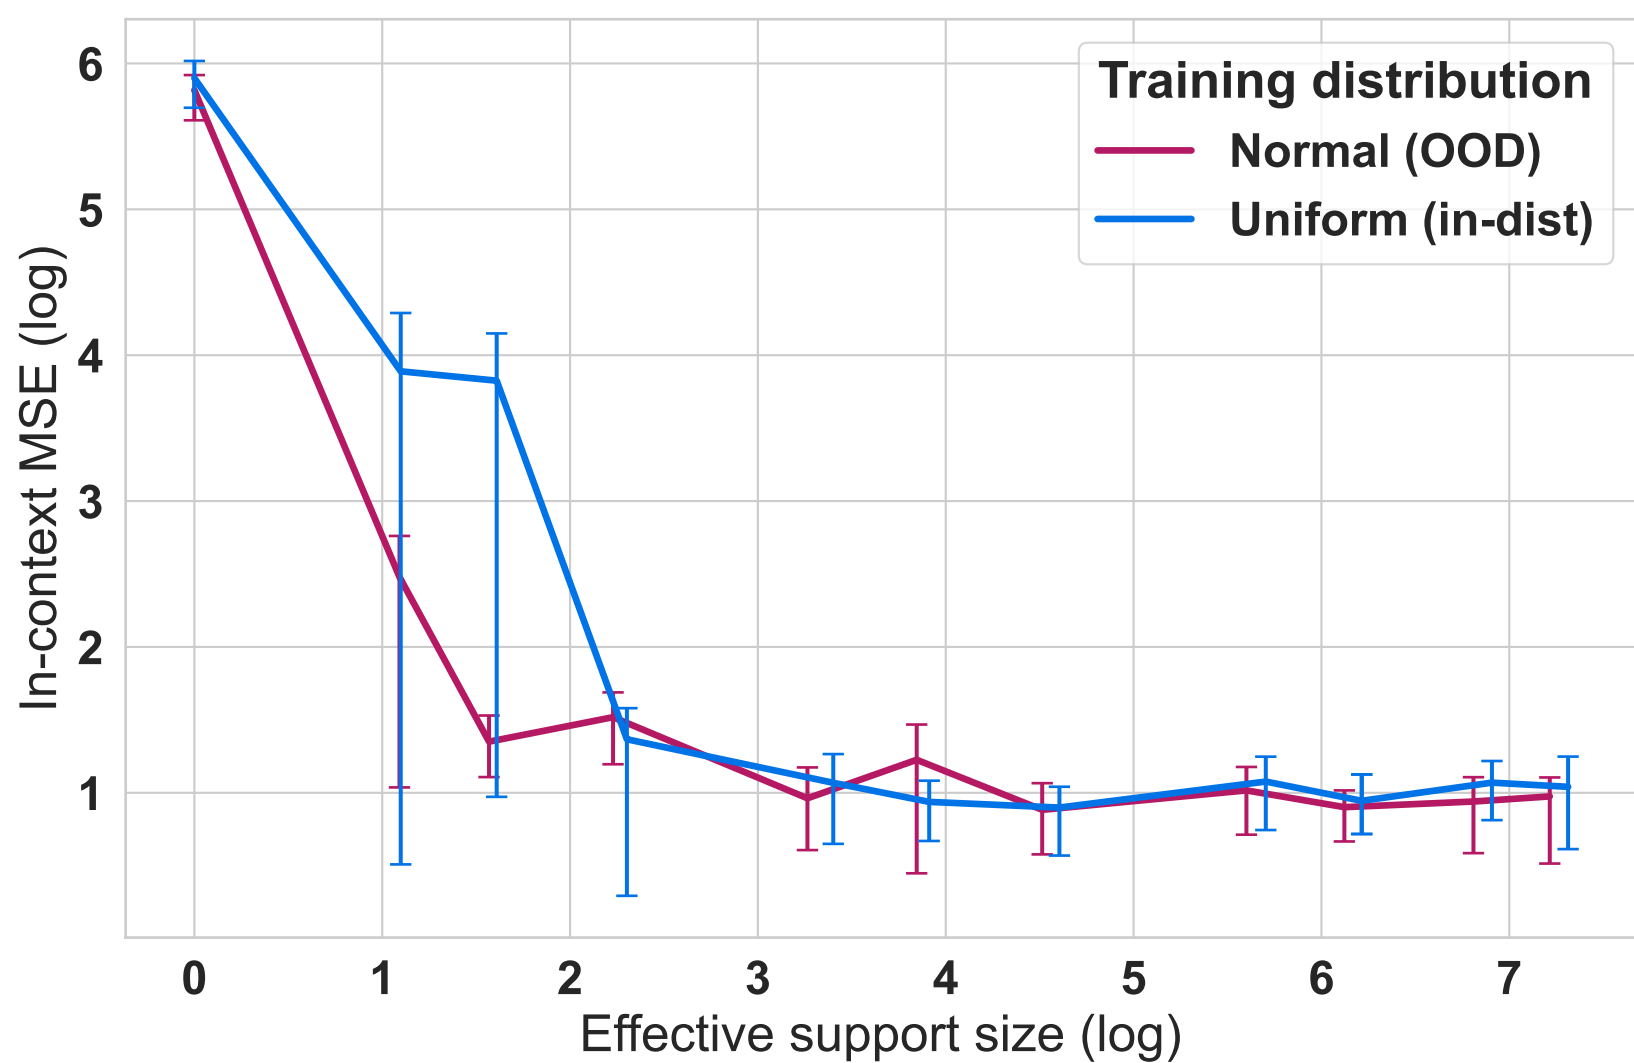

Supplement: supplementary_material [file ess_35.pdf › code_to_release/src/visualizations/ess_35.pdf]

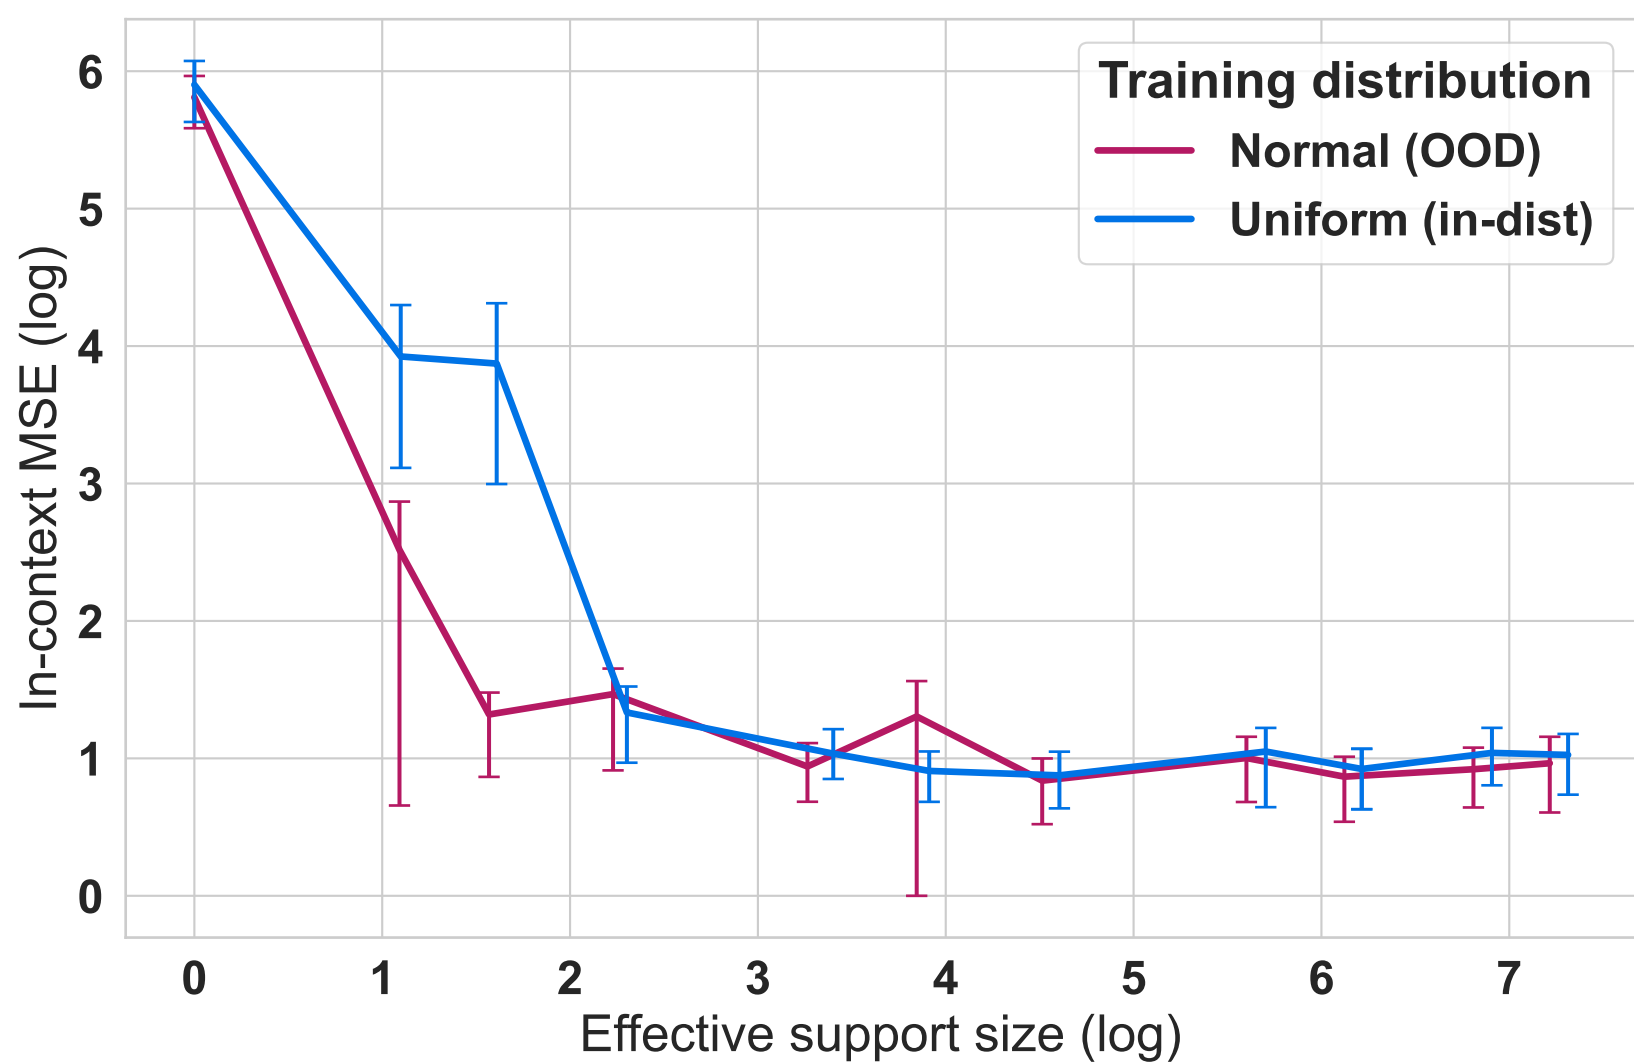

Supplement: supplementary_material [file ess_45.pdf › code_to_release/src/visualizations/ess_45.pdf]

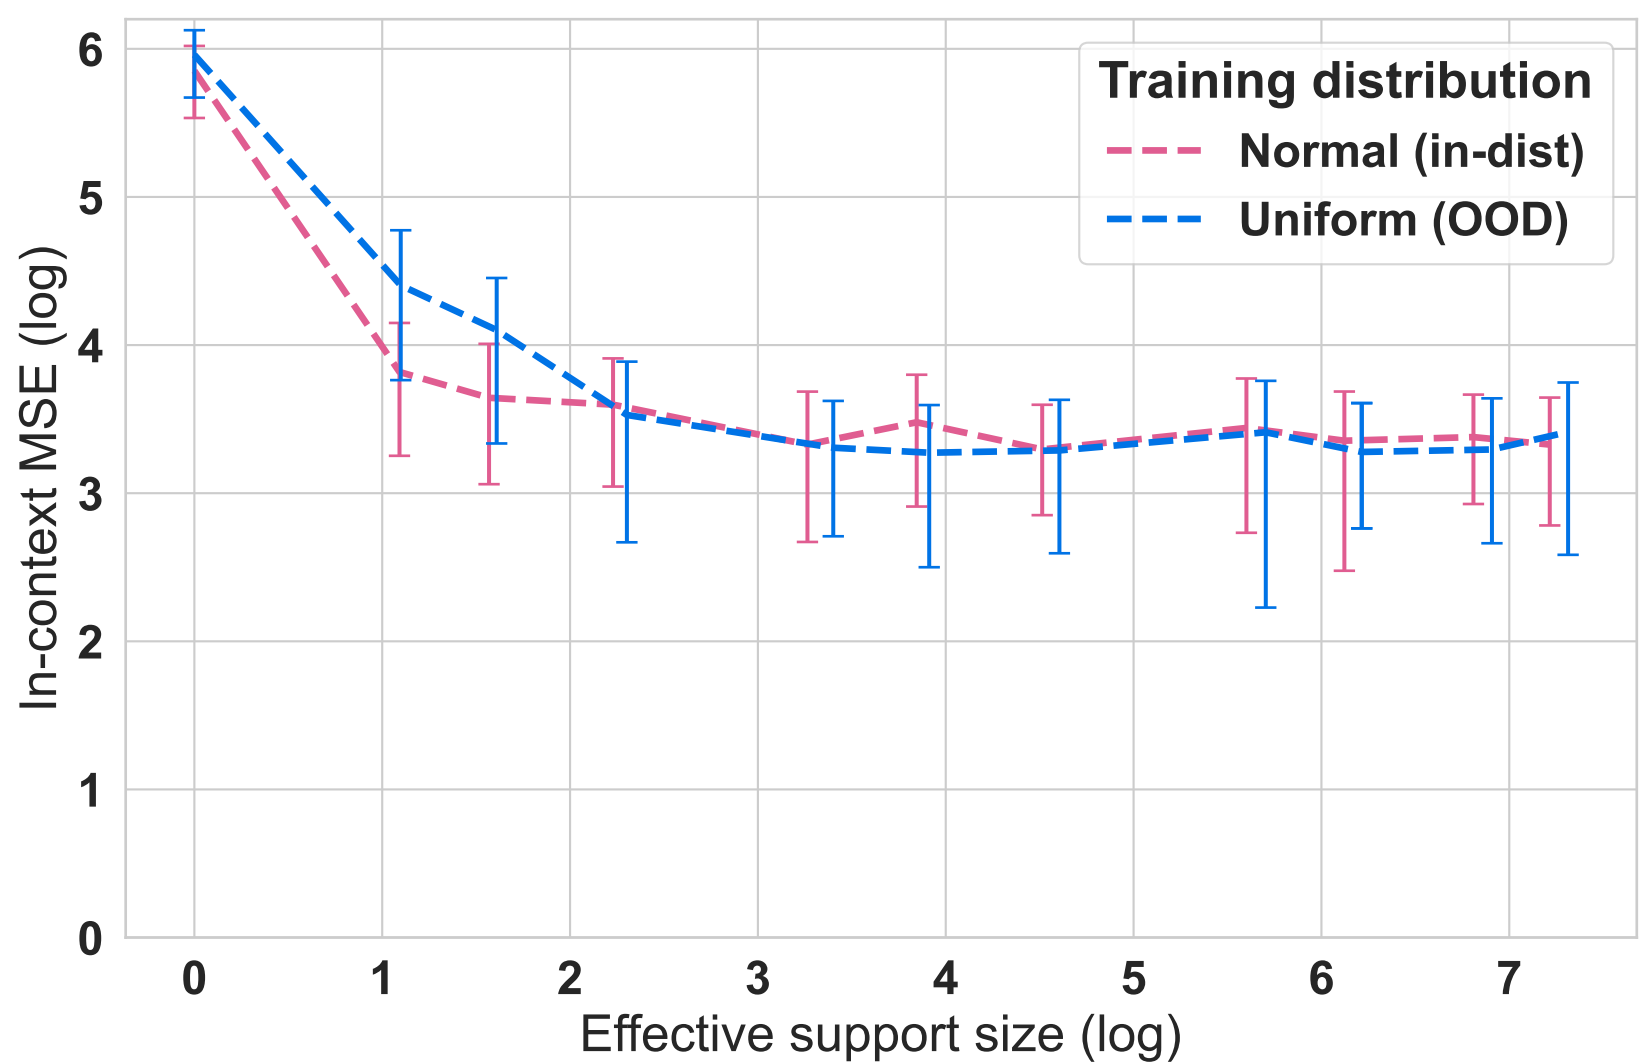

Supplement: supplementary_material [file ess_normal_eval_1.pdf › code_to_release/src/visualizations/ess_normal_eval_1.pdf]

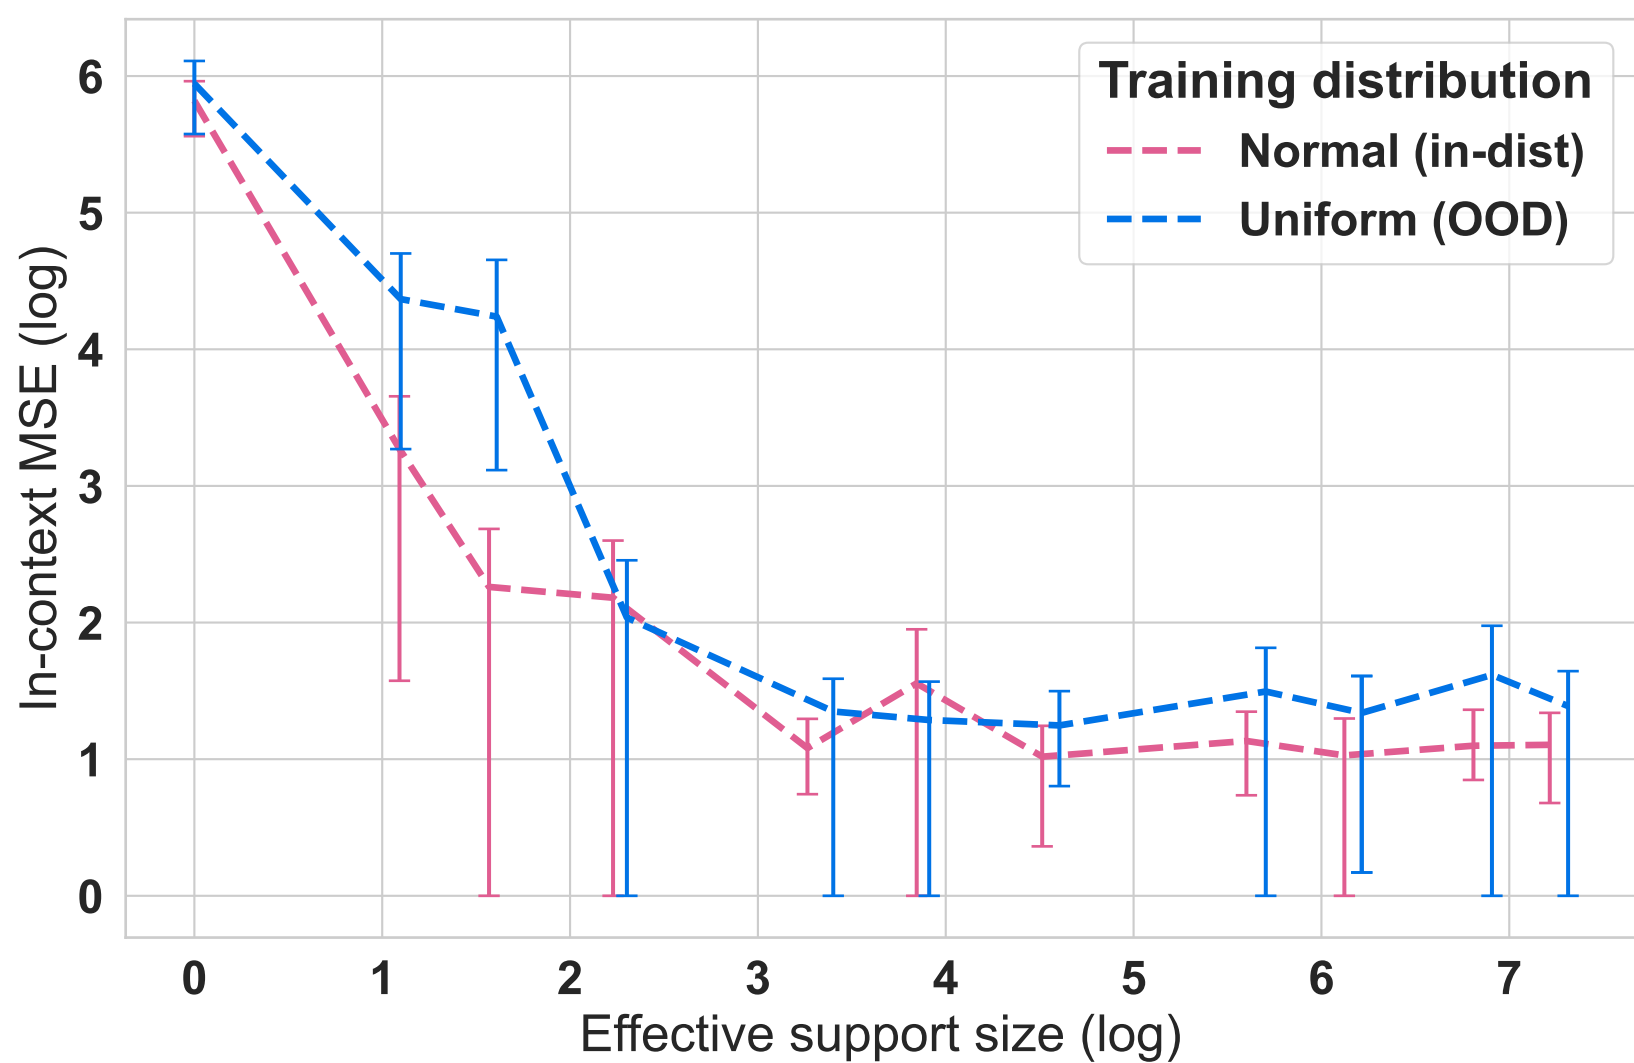

Supplement: supplementary_material [file ess_normal_eval_35.pdf › code_to_release/src/visualizations/ess_normal_eval_35.pdf]

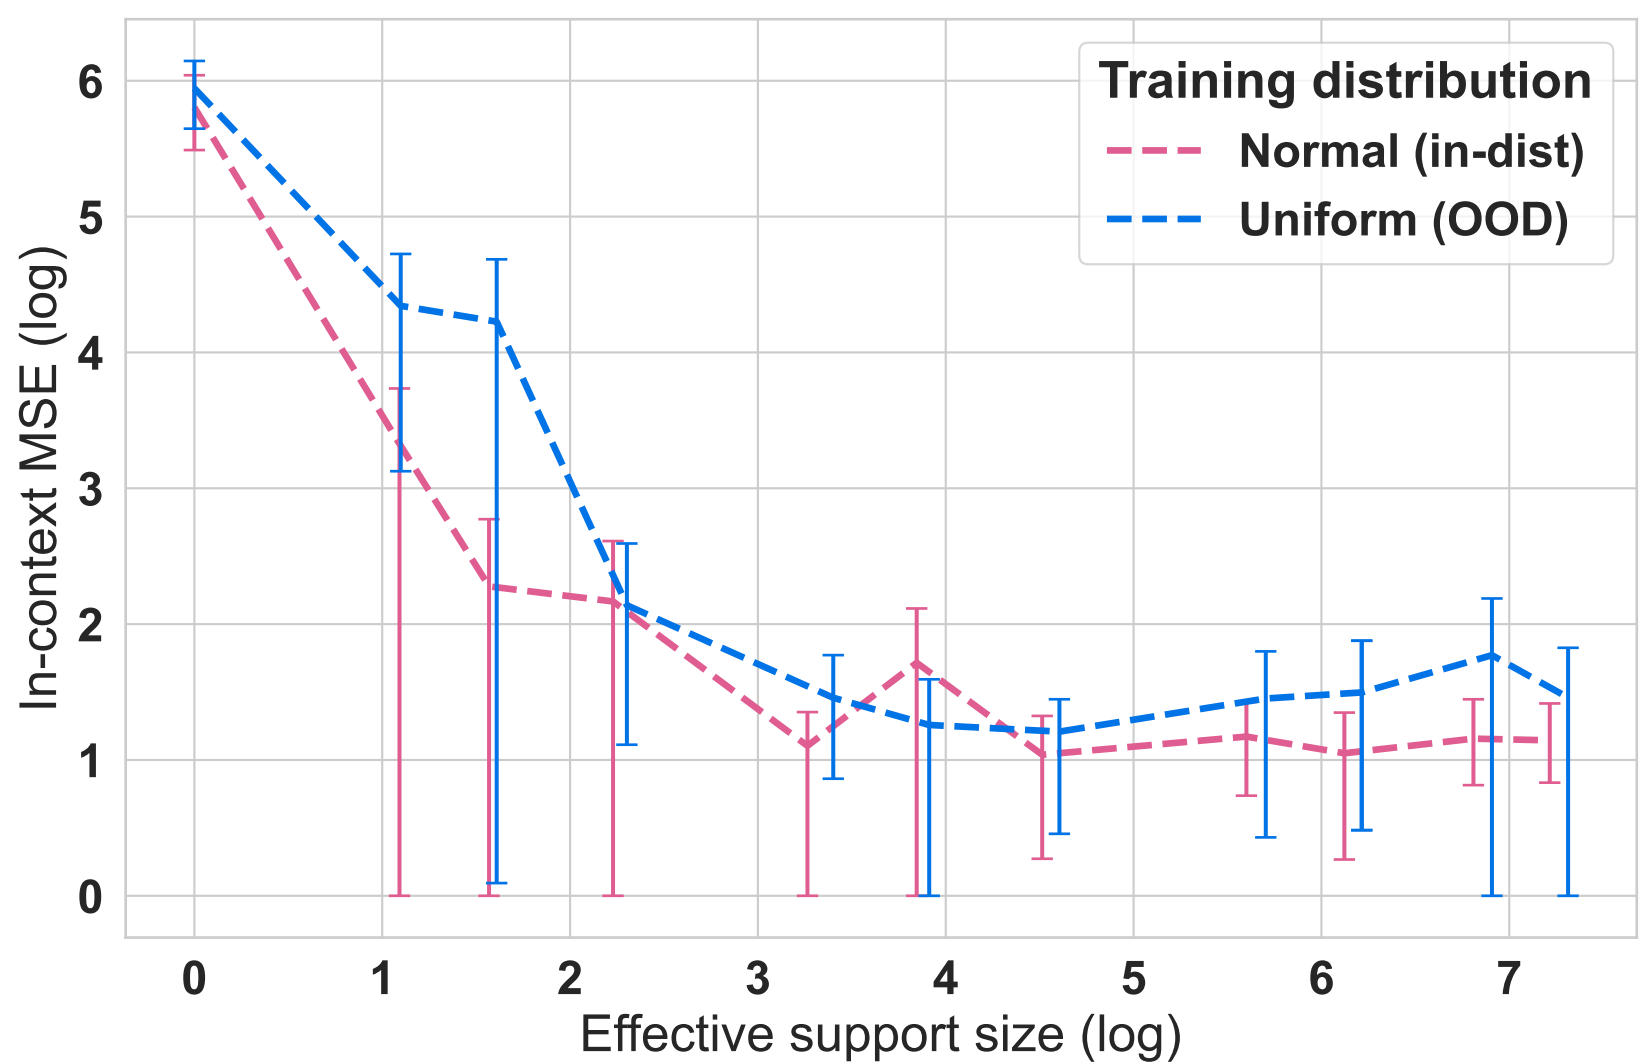

Supplement: supplementary_material [file ess_normal_eval_45.pdf › code_to_release/src/visualizations/ess_normal_eval_45.pdf]

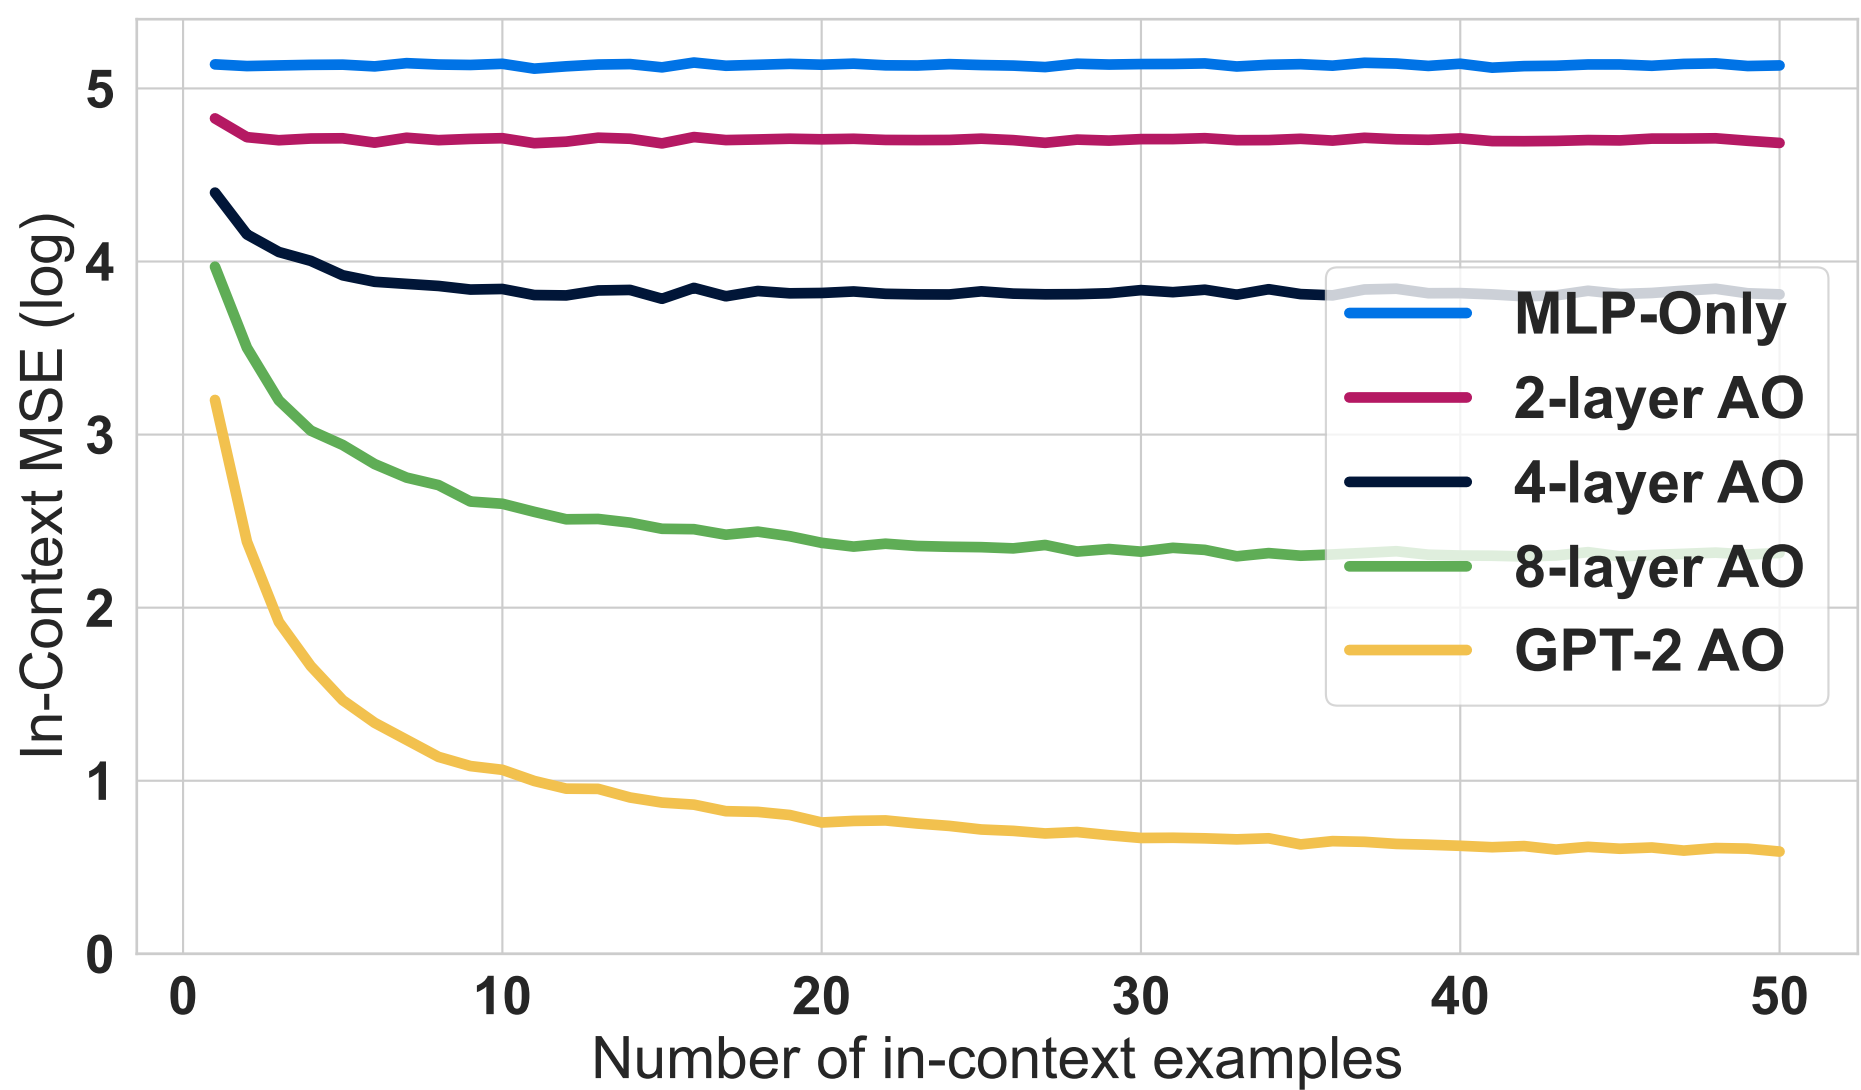

Supplement: supplementary_material [file mse_attention.pdf › code_to_release/src/visualizations/mse_attention.pdf]

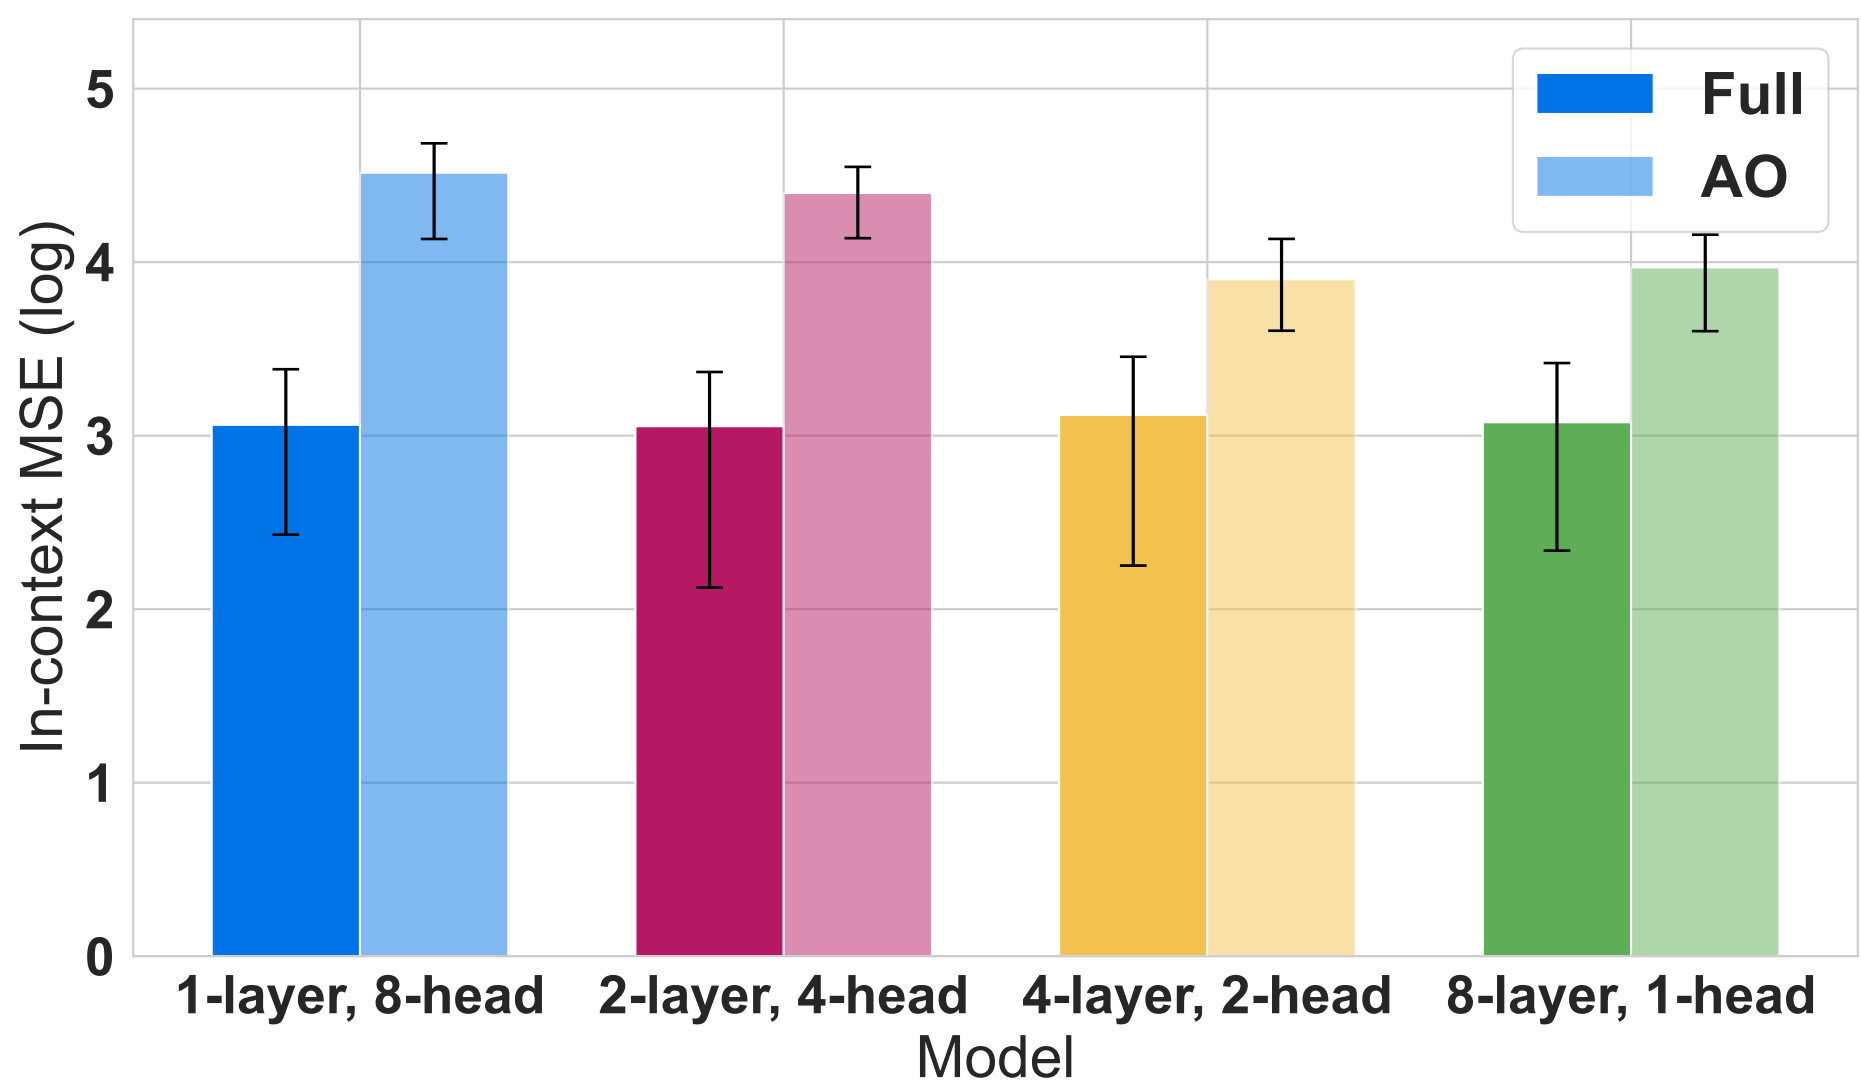

Supplement: supplementary_material [file mse_bar_1.pdf › code_to_release/src/visualizations/mse_bar_1.pdf]

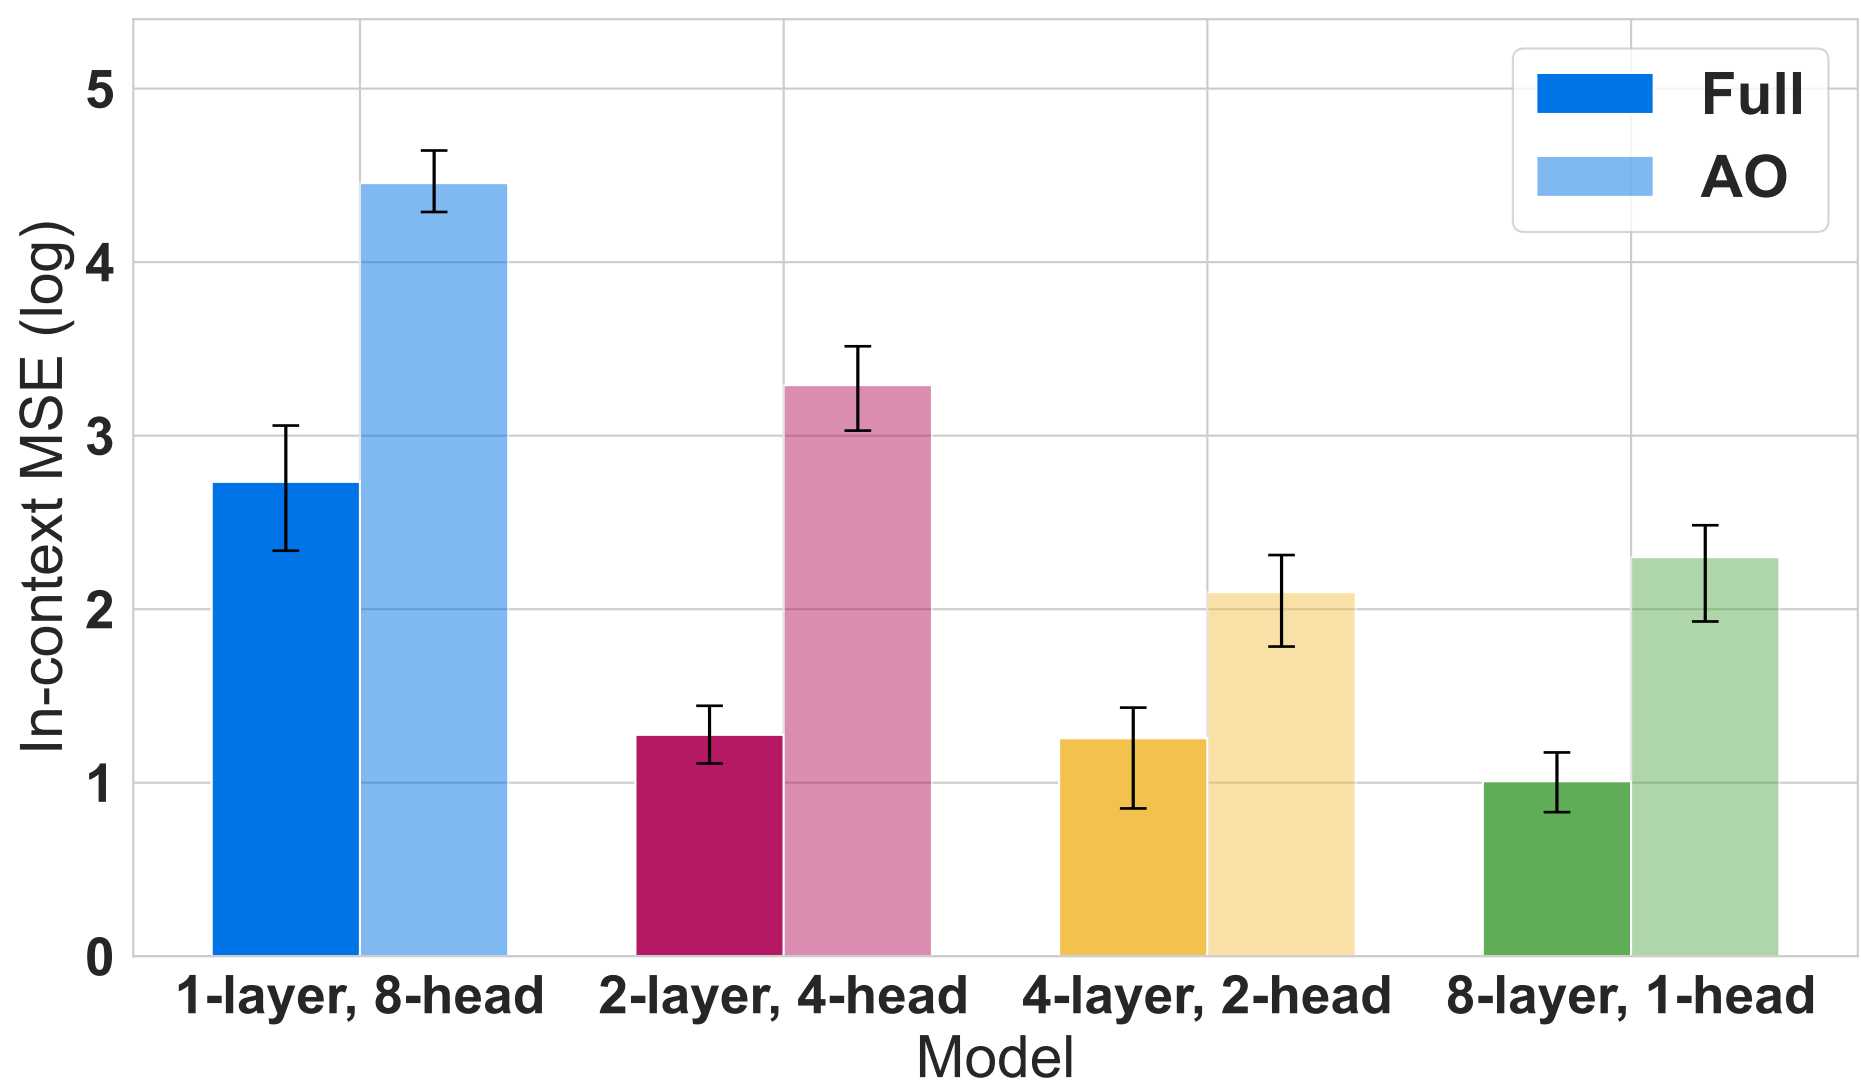

Supplement: supplementary_material [file mse_bar_35.pdf › code_to_release/src/visualizations/mse_bar_35.pdf]

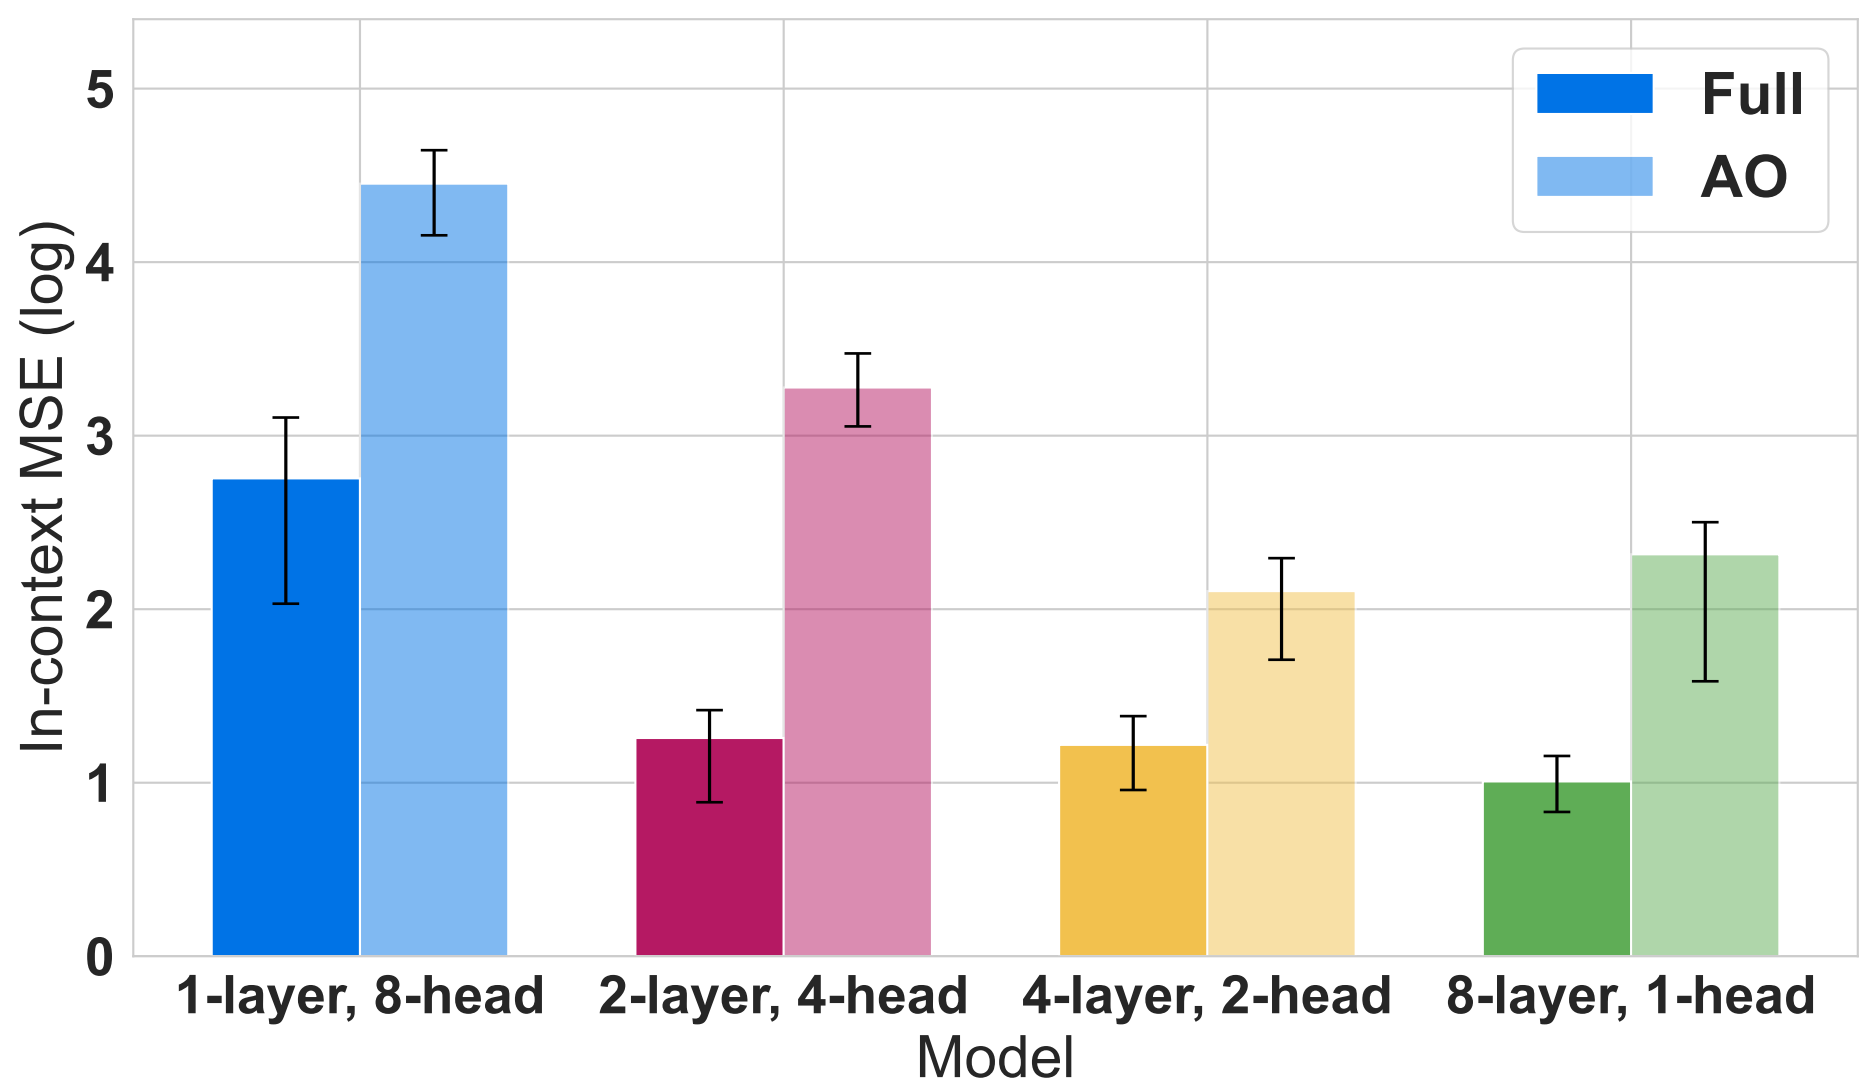

Supplement: supplementary_material [file mse_bar_50.pdf › code_to_release/src/visualizations/mse_bar_50.pdf]

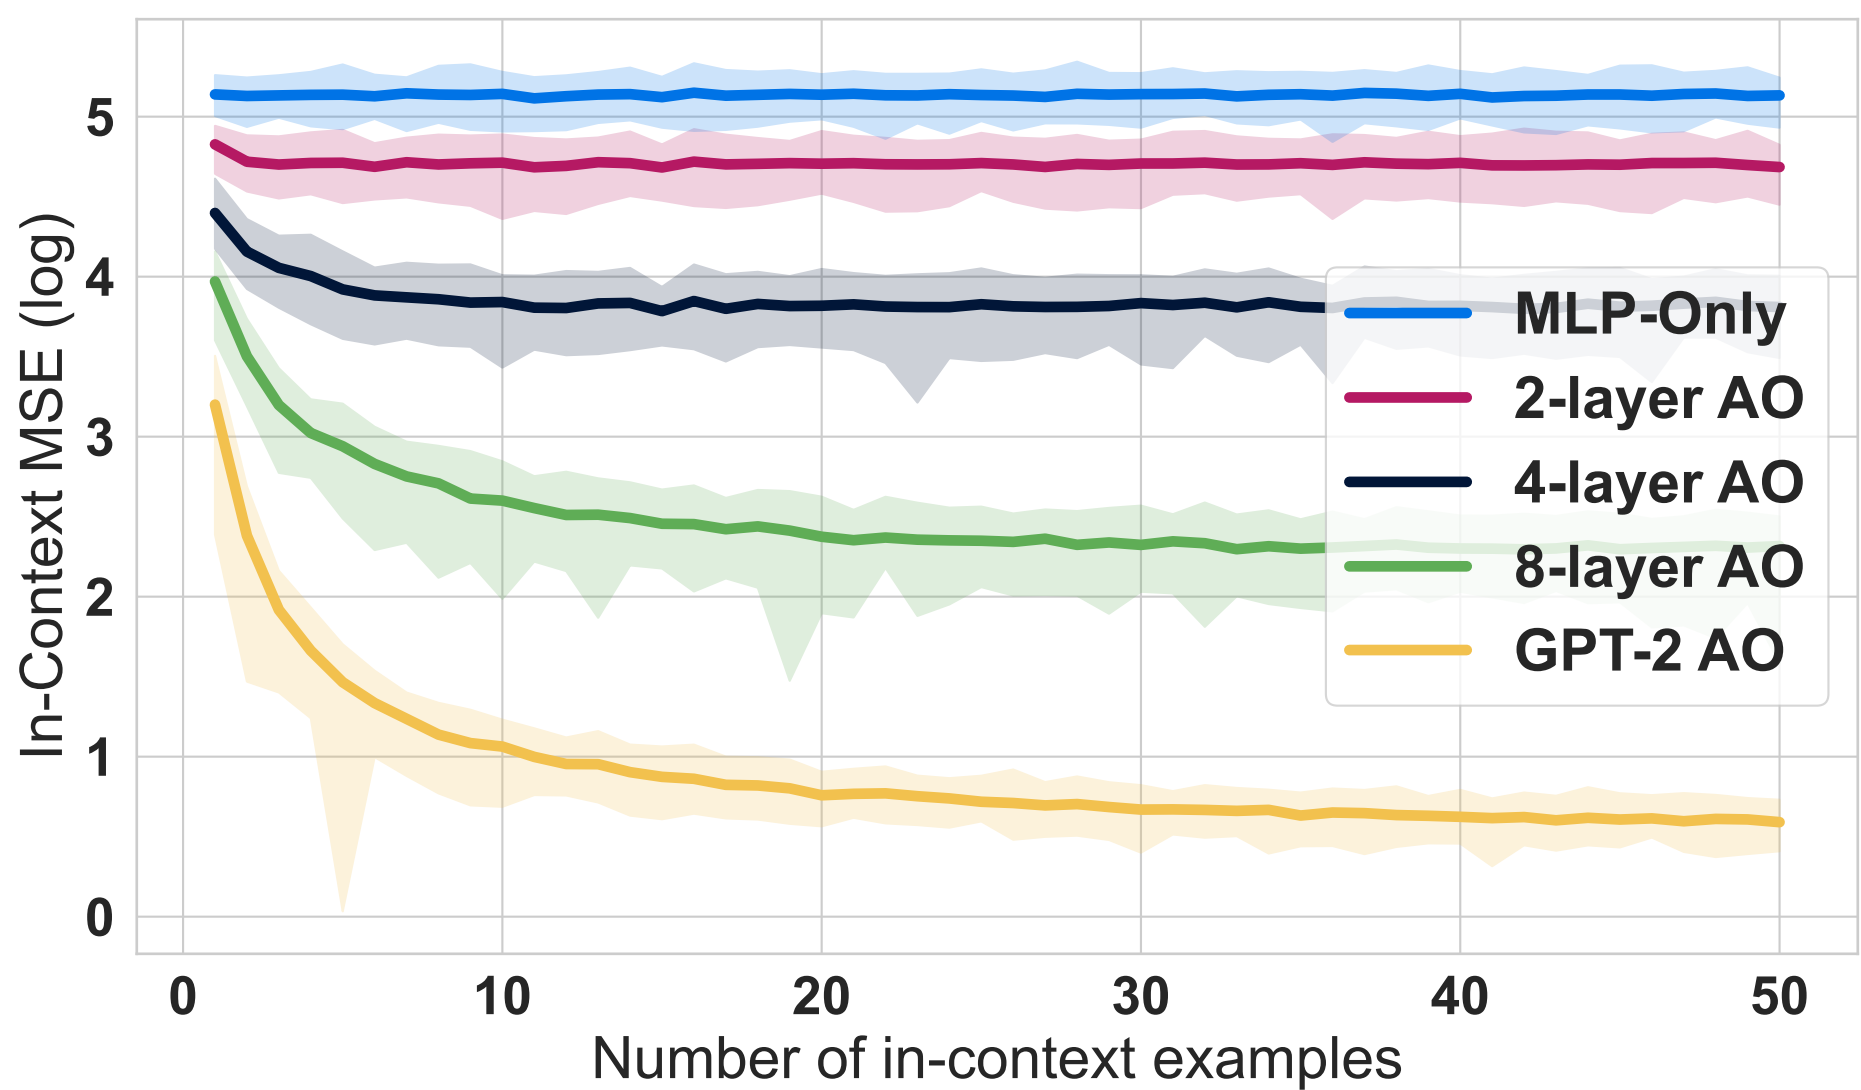

Supplement: supplementary_material [file mse_ci_attention.pdf › code_to_release/src/visualizations/mse_ci_attention.pdf]

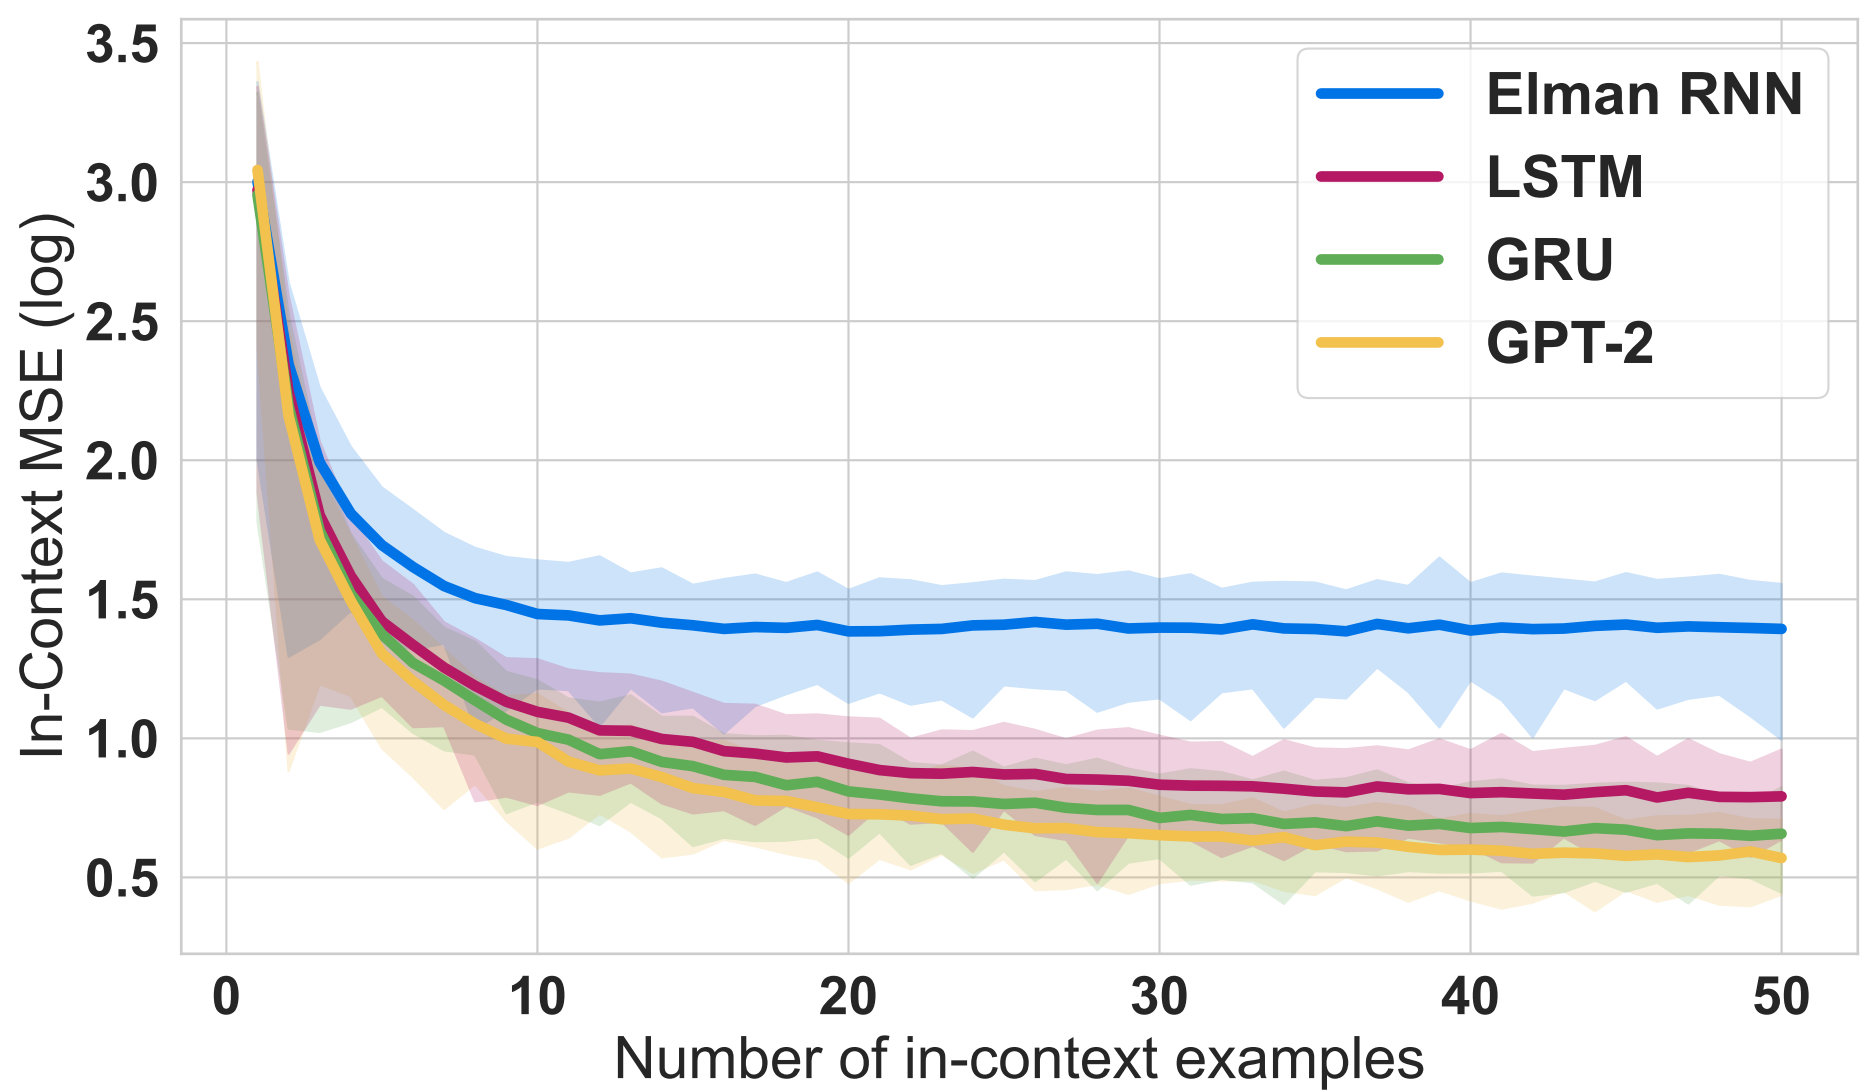

Supplement: supplementary_material [file mse_ci_rnn.pdf › code_to_release/src/visualizations/mse_ci_rnn.pdf]

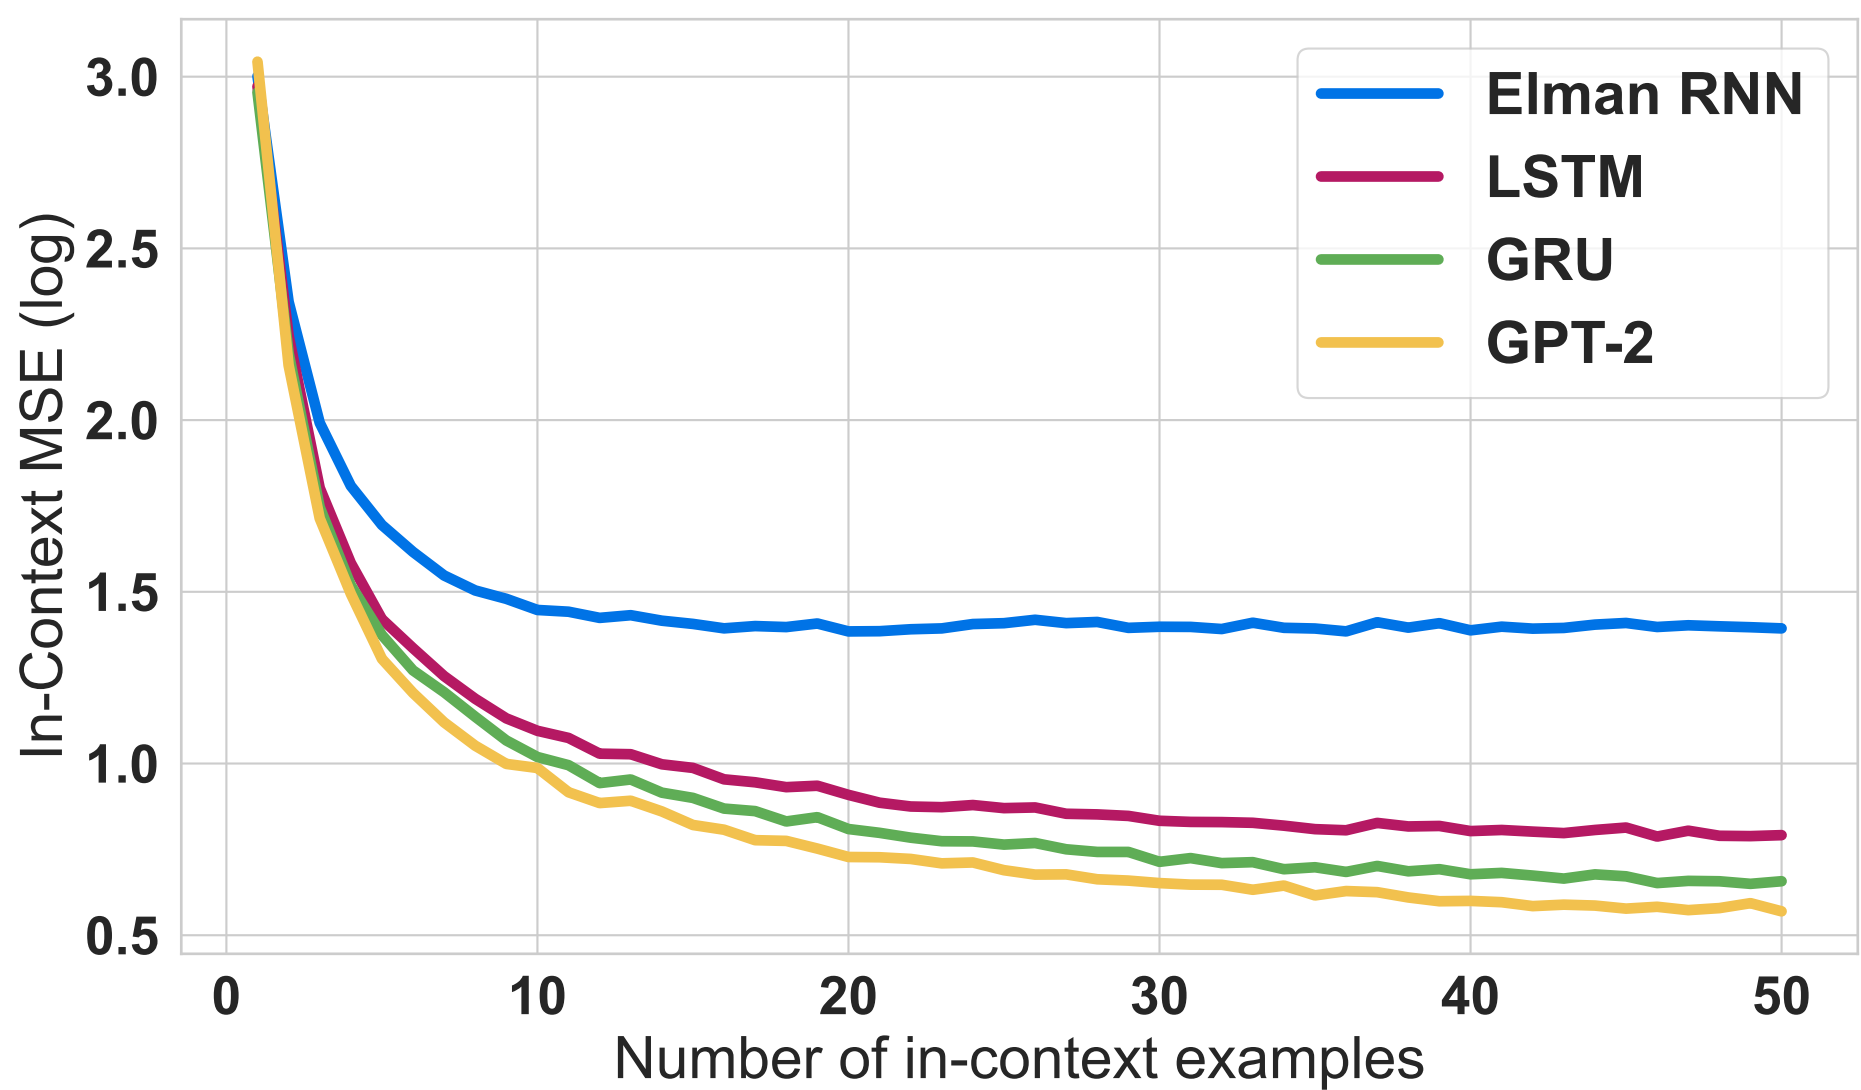

Supplement: supplementary_material [file mse_rnn.pdf › code_to_release/src/visualizations/mse_rnn.pdf]

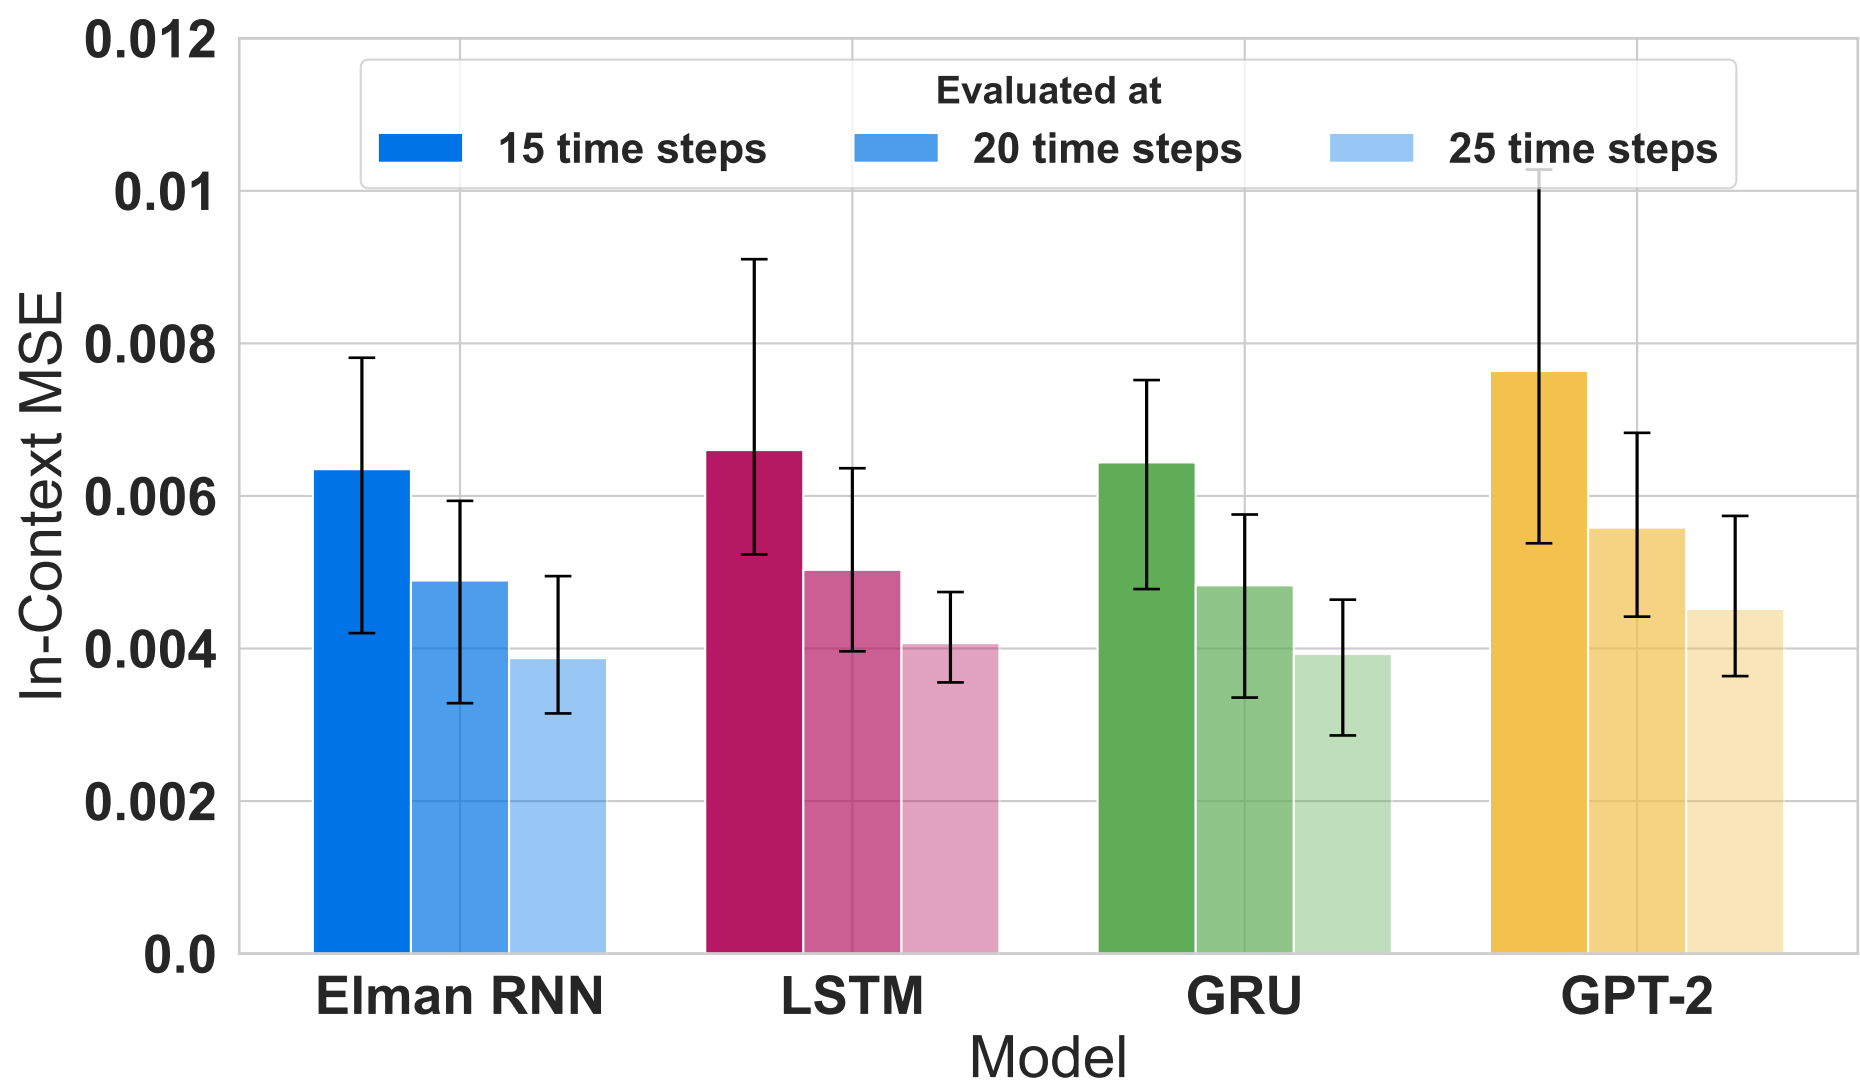

Supplement: supplementary_material [file mse_sde_bar_rnn.pdf › code_to_release/src/visualizations/mse_sde_bar_rnn.pdf]
